1 **Title:** Corticothalamic Projections Deliver Enhanced-Responses to Medial Geniculate  
2 Body as a Function of the Temporal Reliability of the Stimulus

3

4 **Authors:** Srinivasa P Kommajosyula<sup>1</sup>, Edward L. Bartlett<sup>2</sup>, Rui Cai<sup>1</sup>, Lynne Ling<sup>1</sup>, and  
5 Donald Caspary<sup>1</sup>

6 **Affiliations:** <sup>1</sup>Southern Illinois University School of Medicine, Department of  
7 Pharmacology, Springfield, IL, 62702

8 <sup>2</sup>Department of Biological Sciences and the Weldon School of Biomedical Engineering,  
9 Purdue University, West Lafayette, IN, 47907

10 **Corresponding author:**

11 Donald M. Caspary

12 Department of Pharmacology, Southern Illinois University School of Medicine

13 PO Box 19629

14 Springfield, IL 62794-9629

15 [dcaspary@siumed.edu](mailto:dcaspary@siumed.edu)

16

17 **Key words:** Auditory thalamus, less distinct modulated stimuli; sensory  
18 adaptation, repetition-enhancement

19

20 **Key points:**

- 21 • Aging has been shown to increase temporal jitter in the ascending acoustic code  
22 prompting use of cognitive/attentional mechanisms to help better understand  
23 communication-like signals.

- 24 • Auditory thalamus receives extensive projections from cortex that are implicated  
25 in delivering higher-order cortical computations to enhance thalamic responses.
- 26 • The present study modeled aging in young rats by using temporally less distinct  
27 stimuli shown to alter the pattern of MGB unit responses from response  
28 adaptation to repetition-enhancement. Enhanced responses to repeating less  
29 temporally distinct modulated stimuli were reversed when inputs from cortex to  
30 auditory thalamus were blocked. Collectively, these data argue that low salience  
31 temporal signals engage cortical processes to enhance coding of weakly  
32 modulated signals in auditory thalamus.

33

### 34 **Abstract**

35 Aging and challenging signal-in-noise conditions are known to engage use of cortical  
36 resources to help maintain speech understanding. Extensive corticothalamic projections  
37 are thought to provide attentional, mnemonic and cognitive-related inputs in support of  
38 sensory inferior colliculus (IC) inputs to the medial geniculate body (MGB). Here we  
39 show that a decrease in modulation depth, a temporally less distinct periodic acoustic  
40 signal, leads to a jittered ascending temporal code, changing MGB unit responses from  
41 adapting responses to responses showing *repetition-enhancement*, posited to aid  
42 identification of important communication and environmental sounds. Young-adult male  
43 Fischer Brown Norway rats, injected with the inhibitory opsin archaerhodopsin T (ArchT)  
44 into the primary auditory cortex (A1), were subsequently studied using optrodes to  
45 record single-units in MGB. Decreasing the modulation depth of acoustic stimuli  
46 significantly increased repetition-enhancement. Repetition-enhancement was blocked  
47 by optical inactivation of corticothalamic terminals in MGB. These data support a role for  
48 corticothalamic projections in repetition-enhancement, implying that predictive  
49 anticipation could be used to improve neural representation of weakly modulated  
50 sounds.

## 51 Introduction

52 Speech intelligibility can be maintained in noisy backgrounds and in the aged auditory  
53 system by increased use of linguistic/contextual redundancies engaged to substitute for  
54 sensory deficits (Warren, 1970; Wingfield, 1975; Peelle & Wingfield, 2016; Pichora-  
55 Fuller *et al.*, 2016; Anderson *et al.*, 2020). For young-adults in cluttered acoustic  
56 environments and older individuals affected by age-related hearing loss (presbycusis),  
57 higher-order/cortical resources are brought into play to help disambiguate acoustic  
58 signals (Shinn-Cunningham & Wang, 2008; Davis *et al.*, 2011; Obleser, 2014; Başkent  
59 *et al.*, 2016; Vaden *et al.*, 2016; Pichora-Fuller *et al.*, 2017). Peripheral deficits only  
60 partially account for the age-related loss of speech understanding (Humes *et al.*, 2012;  
61 Roque *et al.*, 2019). Sensory declines in aging may be simulated in young participants  
62 by decreasing the temporal distinctiveness of presented acoustic stimuli either by  
63 adding noise or decreasing modulation depth, resulting in a temporally jittered  
64 ascending acoustic code showing decreases in envelope-locked responses (Dubno *et al.*,  
65 1984; Fitzgibbons & Gordon-Salant, 1994; Pichora-Fuller *et al.*, 2007; Dimitrijevic *et al.*,  
66 2016; Mamo *et al.*, 2016). Studies in non-human primates and rabbits using  
67 amplitude modulated stimuli have reported an increased neural jitter by decreasing the  
68 modulation depth of amplitude-modulated stimuli (Nelson & Carney, 2007; Malone *et al.*,  
69 2010). Recent studies support use of increased top-down predictive resources to  
70 help decode challenging sensory stimuli such as in speech-in-noise or less temporally  
71 distinct speech (Pichora-Fuller *et al.*, 2017; Anderson & Karawani, 2020).

72 Sensory adaptation has been observed in thalamus and cortex, for all sensory  
73 modalities, with declining responses for repeated stimuli (Ulanovsky *et al.*, 2003; Bartlett  
74 & Wang, 2005; Pérez-González & Malmierca, 2014). In contrast to sensory adaptation,  
75 repetition-enhancement, perhaps prediction, to a repeating stimulus has been reported  
76 when acoustic signals were less temporally distinct, attended to, expected for statistical  
77 regularities, and/or with stimuli presented at higher rates in challenging conditions (Luce  
78 & Pisoni, 1998; Heinemann *et al.*, 2011; de Gardelle *et al.*, 2013; Müller *et al.*, 2013;  
79 Kommajosyula *et al.*, 2019). The current study was designed to examine the role of  
80 corticothalamic/top-down projections to medial geniculate body (MGB) in mediating

81 repetition adaptation/enhancement responses to repeating stimuli of different  
82 modulation depths.

83 The auditory thalamus is a key subcortical structure suggested to play a critical role in  
84 auditory processing. Sensory systems show attention/task/context-dependent changes  
85 in thalamic activity, likely reflecting increasingly engaged corticofugal circuits (von  
86 Kriegstein *et al.*, 2008; Saalman & Kastner, 2011; Diaz *et al.*, 2012; Mihai *et al.*, 2019;  
87 Tabas & von Kriegstein, 2021). The MGB receives top-down/corticofugal information  
88 from extensive descending corticothalamic (CT) projections (Rouiller & Welker, 1991;  
89 Winer *et al.*, 2001; He, 2003; Bartlett, 2013; Guo *et al.*, 2017; Parras *et al.*, 2017).

90 These excitatory CT projections originate from cortical layer 5&6 neurons and terminate  
91 on the distal dendrites of MGB neurons in all subdivisions, including the lemniscal  
92 ventral division and the non-lemniscal dorsal and medial divisions (Bartlett *et al.*, 2000;  
93 Winer *et al.*, 2005; Smith *et al.*, 2007). Additionally, MGB receives state and salience-  
94 related information from serotonergic/noradrenergic and cholinergic projections  
95 (McCormick & Pape, 1990; Sottile *et al.*, 2017; Schofield & Hurley, 2018). MGB neurons  
96 show stimulus specific adaptation (SSA) to repeated identical stimuli, which upon  
97 presentation of an oddball signal show a significant mismatch signal, thought to code for  
98 deviance detection and prediction error (Anderson & Malmierca, 2013; Malmierca *et al.*,  
99 2015; Parras *et al.*, 2017). MGB unit responses show altered tuning and gain changes  
100 with manipulation of the auditory cortex/corticofugal influences (Orman & Humphrey,  
101 1981; He, 2003; Tang *et al.*, 2012; Malmierca *et al.*, 2015). A recent study by Guo *et al.*  
102 (2017) showed increased detection of acoustic signals involving CT projections, and CT  
103 projections have been shown to be involved in the processing of complex auditory  
104 stimuli (Ono *et al.*, 2006; Rybalko *et al.*, 2006; Homma *et al.*, 2017). However, little is  
105 known about how CT inputs can alter MGB response properties to repeating signals.  
106 The aim of the current study is to examine the impact corticothalamic inputs have on the  
107 coding of random vs. repeating sinusoidal amplitude-modulated (SAM) stimuli of  
108 differing modulation depths.

109 Previous MGB single unit studies found that age- and decreased temporal precision  
110 (decreased modulation depth or adding noise to the envelope) of the temporal cue

111 significantly increased MGB unit preference (discharge-rate) for repeating SAM stimuli  
112 (Cai *et al.*, 2016b; Kommajosyula *et al.*, 2019). Repetition-enhancement was absent in  
113 single-units recorded from MGB in anesthetized rats, suggesting that anesthesia  
114 affected thalamic and cortical responses to abolish repetition enhancement (Cai *et al.*,  
115 2016b). Collectively, these findings suggest that temporally less distinct acoustic cues  
116 and variability due to aging engage top-down/corticofugal influences to enhance  
117 responses evoked by a repeating, weakened ascending temporal code. The present  
118 study examined MGB single unit responses to determine if increased preference for a  
119 repeating less temporally distinct SAM stimulus could be reversed by CT blockade in  
120 young, awake rats.

121

## 122 **Materials and Methods**

123 Male Fischer 344 x Brown Norway (FBN) rats (n = 7), aged 4-6 months old, obtained  
124 from the NIA Aging Rodent Resource Colony supplied by Charles River, were  
125 individually housed on a reverse 12:12-h light-dark cycle with *ad libitum* access to food  
126 and water. FBN rats have a long life-span and lower tumor load than other commonly  
127 used rat aging models. They have been characterized as a rat model of aging (Cai *et*  
128 *al.*, 2018), and age-related changes in central auditory structures have been extensively  
129 studied (Caspary *et al.*, 2008; Caspary & Llano, 2018; Mafi *et al.*, 2020). Procedures  
130 were performed in accordance with guidelines and protocols approved (Ref. No. 41-  
131 018-004) by the Southern Illinois University School of Medicine Lab Animal Care and  
132 Use Committee.

### 133 **Microinjection**

134 Adenoviral vectors (AAV-CAG-ArchT-GFP, AAV serotype 1) with light-activated proton  
135 pump and eYFP expressed under the control of a CAG (CMV enhancer, chicken beta-  
136 Actin promoter and rabbit beta-Globin splice acceptor site) were obtained from the  
137 University of North Carolina Vector Core (Chapel Hill, NC). Young-adult FBN rats were  
138 anesthetized initially with ketamine (105 mg/kg)/xylazine (7 mg/kg) and maintained with  
139 isoflurane (0.5–1%) throughout the duration of the surgery. A small hole was drilled into

140 the skull and dura mater removed. Viral vectors were injected intracranially into left  
141 auditory cortex using the Neurostar stereotaxic drill and injection system (stereodrive  
142 015.838, injectomate IM28350, stereodrill DR352; Neurostar, Germany). Coordinates of  
143 the injection sites were primary auditory cortex (A1) layers 5 and 6 (L5 and L6), entry at  
144 22° angle laterally (-8.93, -1.8, 4.37 mm relative to bregma). Animals were allowed to  
145 recover for 21 days to allow viral expression to transport to the level of CT terminals in  
146 the MGB (Fig. 1A).

### 147 ***Acoustic brainstem response (ABR) recording***

148 To ensure normal hearing thresholds, prior to optetrode implantation and 14-21 days  
149 after microinjection, auditory brainstem responses (ABR) were collected from all rats as  
150 previously described (Wang *et al.*, 2009; Cai *et al.*, 2016b).

### 151 ***Awake recordings***

152 Three days following ABR testing, rats began 6-10 day acclimation training in a modified  
153 Experimental Conditioning Unit (ECU; Braintree Scientific, Braintree, MA) with free  
154 access to water and food reward (1/4 to 1/2 Froot™ Loop) until they could remain  
155 quiet/still for up to 3 hours. Prior to surgical implantation, VersaDrive8 optical tetrode  
156 drives (Neuralynx, Bozeman, MT) with an additional drive shaft for optical probe were  
157 assembled and loaded similarly to VersaDrive4 previously described (Richardson *et al.*,  
158 2013; Kalappa *et al.*, 2014; Cai *et al.*, 2016b). In a dark sound proof booth, there were  
159 no other known distractors to divide the rat's attention during this passive listening task,  
160 with SAM stimuli presented from a speaker located above the rat's head. We recorded  
161 20-25, 45 minute-sessions from each rat. After isolation of a single-unit, spontaneous  
162 activity, rate-level functions, and response maps were collected before collecting unit  
163 responses to SAM stimulus set. Of the 80 units studied, 95% were clearly isolated  
164 single-units (high signal-in-noise ratio, similar amplitude and shape as single units or  
165 sorted using principal component analysis) the remaining 5% of units were from small  
166 inseparable unit clusters (2-3) are included since no differences in response properties  
167 were observed.

168 All recordings were completed within a 4 week period following implantation recovery.  
169 When recordings were complete, rats were anesthetized with ketamine and xylazine as

170 described above and current pulses (5-10  $\mu$ A for 5 s, nano Z, Neuralynx, Bozeman, MT)  
171 were passed through the tips of each tetrode wire, producing a small electrolytic lesions.  
172 Rats were cardiac perfused with phosphate-buffered saline (0.1 M, pH 7.4) followed by  
173 4% paraformaldehyde (Sigma, St. Louis, MO), brains were removed, post-fixed for 24 h  
174 in 4% paraformaldehyde at 4°C, transferred to 20% sucrose and stored at 4°C until  
175 sectioned. To assess the position of recordings, frozen coronal sections (30–35  $\mu$ m  
176 thick) were slide mounted with electrode tracks and lesion sites visible using phase-  
177 contrast microscopy. Based on each recording site relative to the final location of the  
178 tetrode tip, dimensions of the optetrode placement and MGB anatomy, an approximate  
179 location of each recorded unit was derived (Paxinos & Watson, 1998).

### 180 ***Electrophysiological recordings and optical stimulation***

181 Stimulus paradigms and single unit sorting/recording procedures were the same as for  
182 awake rats as in previous studies (Kommajosyula *et al.*, 2019). Briefly, extracellularly  
183 recorded single spikes, signal to noise ratio of at least 10:1, and with similar waveform  
184 were isolated/thresholded with small spike unit clusters sorted using of principal  
185 component analysis. Stimulus presentation real-time data display and analysis used  
186 ANECS software (Dr. K. Hancock, Blue Hills Scientific, Boston, MA). Acoustic signals  
187 were generated using a 16-bit D/A converter (TDT RX6, TDT System III, Tucker Davis  
188 Technologies, Alachua, FL), and transduced by a Fostex tweeter (model FT17H,  
189 Fostex, Middleton, WI) placed 30 cm above animal's head. The Fostex tweeter was  
190 calibrated off-line using a ¼ inch microphone (model: 4938; Brüel & Kjær, Naerum,  
191 Denmark) placed at the approximate location of the rat's head. ANECS generated  
192 calibration tables in dB sound pressure level (SPL) were used to set programmable  
193 attenuators (TDT PA5) to achieve pure-tone levels accurate to within 2 dB SPL for  
194 frequencies up to 45 kHz. The TDT generated “sync-pulse” was connected to an LED  
195 optical system (200  $\mu$ m, 0.39 NA, Thorlabs Inc., NJ) with LED driver (M565F3, LEDD1B,  
196 Thorlabs Inc.). Optical stimuli from LED driver were calibrated prior to experiments  
197 using optical power meter (S121C and PM121D, Thorlabs Inc., NJ). Optical stimuli were  
198 565 nm wavelength as determined to be the best wavelength for photo-inhibition  
199 mediated by ArchT (Han *et al.*, 2011). Optogenetic stimulus parameters were chosen to

200 allow for simultaneous stimulation of sound and optical stimuli based on previous and  
201 our own preliminary studies: 2.56 mw ( $\sim 20.38$  mW/mm<sup>2</sup>) intensity presented for 20-40  
202 ms and at 10 Hz regardless of modulation frequencies ( $f_{\text{mod}}$ ) (Kato *et al.*, 2017; Natan *et*  
203 *al.*, 2017; Bigelow *et al.*, 2019).

#### 204 ***Experimental design: SAM stimulus paradigms and data acquisition***

205 The present study compared the single unit responses in response to three paradigms  
206 presented in either a random or repeating paradigm: 1) Fully modulated SAM  
207 (SAM $_{\Delta 100\%}$ ), considered the standard clear temporal signal; 2) SAM at 25% modulation  
208 depth (SAM $_{\Delta 25\%}$ ) considered a less temporally distinct signal; 3) SAM $_{\Delta 25\%}$  with during  
209 corticothalamic blockade (+ CT blockade) (Fig. 1B & 2). There were only small  
210 differences (< 2 dB) in total energy levels between the standard (SAM $_{\Delta 100\%}$ ) and lower  
211 modulation depth SAM $_{\Delta 25\%}$  stimuli. We will interchangeably use standard (SAM $_{\Delta 100\%}$ )  
212 and less temporally distinct SAM (SAM $_{\Delta 25\%}$ ) across the manuscript. The less temporally  
213 distinct SAM stimulus was chosen, in part, as a surrogate for aging to reproduce prior  
214 results (Cai *et al.*, 2016a; Kommajosyula *et al.*, 2019). Kommajosyula *et al.* (2019)  
215 found that SAM $_{\Delta 100\%}$  with 1.0kHz noise jittering the envelope gave similar results to  
216 SAM $_{\Delta 25\%}$ . The SAM carrier was generally BBN, but the unit's (characteristic frequency)  
217 CF was used as carrier if the unit was more strongly driven by CF-tones. Rate  
218 modulation transfer functions (rMTFs) and temporal modulation transfer functions  
219 (tMTFs) were collected at 30-35 dB above CF or BBN threshold. SAM stimuli were of  
220 450 ms duration, presented at 2/sec with a 4 ms raise-fall;  $f_{\text{mods}}$  were stepped between 2  
221 and 1024 Hz (Fig. 1B). SAM stimuli were presented as two separate sets:  
222 pseudorandomly, from now on referred to as random across trial (interleaved)  $f_{\text{mods}}$  or  
223 identical repeating/blocks of SAM, with each  $f_{\text{mod}}$  repeated (10 times) before being  
224 stepped to the next  $f_{\text{mod}}$  in a stepped increasing order (Fig. 1B). To control for order of  
225 presentation during repeating trials, we tested  $f_{\text{mods}}$  stepped in descending steps/reverse  
226 order, from 1024 to 2 Hz and found that presentation order (descending or ascending)  
227 made no difference on spike count. All reported data for repeating SAM trials were  
228 stepped from 2 to 1024 Hz. Spikes were collected over a 500 ms period following  
229 stimulus onset, with 10 stimulus repetitions at each envelope frequency. Responses to



230 CT blockade examined the role of CT MGB projection during SAM $_{\Delta 25\%}$  stimuli. The  
 231 effect of CT blockade on coding SAM $_{\Delta 100\%}$  was collected from a subset of MGB units  
 232 neurons. Data were collected every day for 3-4 weeks after implantation. Data were  
 233 recorded only if single-unit responses were repeatable and consistent across multiple  
 234 trials.

235 Rate-level functions and spontaneous activity (250 epochs of 250 ms each) were  
 236 recorded in presence and absence of optical blockade. Broadband noise (BBN) (200  
 237 ms, 4 ms rise-fall, 2/sec) stimuli were stepped in rate-level functions (0 dB to 80 dB) and  
 238 responses were collected over a 500 ms period. Response maps were used to  
 239 determine the CF of sorted single units (Cai & Caspary, 2015). Real-time single unit  
 240 activity was sampled at 100 kHz and archived for off-line analysis.

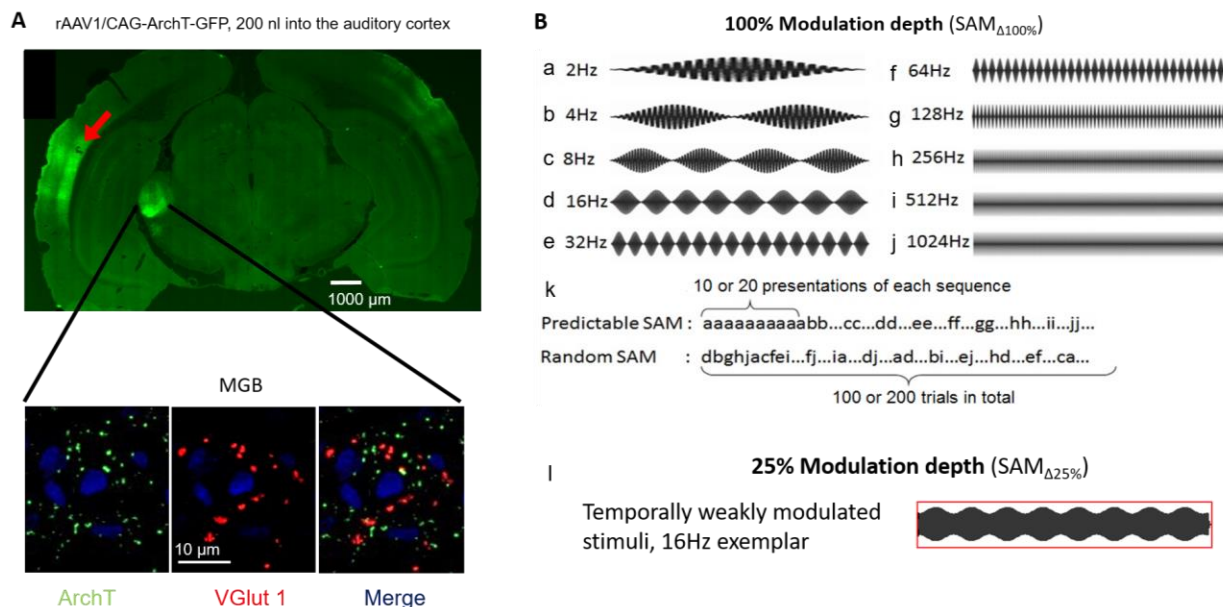

**Fig. 1 Targeting corticothalamic projections and acoustic stimuli** **A:** Confocal image showing a wide-field and inset of AI GFP-labeled (green) viral injection site and excitatory corticothalamic (CT) projection expressing the ArchT pump. Insets show MGB neurons (63x) receiving labeled projection terminals (ArchT, green), and labeled with glutamatergic marker (VGlut1, red) as well as the nuclear marker (DAPI, blue). Merged image depicts colocalization of ArchT with VGlut1. **B:** Sets of sinusoidally amplitude modulated (SAM) stimuli used in the present study. Standard (100% modulation depth [SAM $_{\Delta 100\%}$ ]) SAM stimuli with either a tone or broadband noise carrier in 500 ms epochs from 2 Hz to 1024 Hz modulation frequencies [ $f_{\text{mod}s}$ ] (B, a-j). Stimuli were presented at  $f_{\text{mod}s}$  between 2 Hz to 1024 Hz as either predictable/repeating or random sets (B, k). Exemplar waveforms of temporally weakly modulated/less distinct SAM (25% modulation depth [SAM $_{\Delta 25\%}$ ]) at 16 Hz  $f_{\text{mod}}$  (B, l).

241

## 242 Immunohistochemistry

243 Free-floating slices were processed in parallel and treated with 0.2% Triton-X for 1 h  
 244 and incubated for 2 h in blocking solution containing PBS with 0.1% Triton-X, 1.5%  
 245 normal donkey serum and 3% bovine serum albumin. Sections were transferred to

246 primary antibody solution containing monoclonal mouse anti-vesicular glutamate  
247 transporter 1 (VGlut1) antibody (1:750; Millipore, Burlington, MA) in blocking buffer and  
248 incubated overnight at room temperature. After washing in PBS, sections were  
249 incubated with secondary antibody as follows: donkey anti-mouse IgG (Alexa Fluor 647,  
250 1:150, Jackson ImmunoResearch, West Grove, PA) for 1 h at room temperature. As a  
251 negative control, the primary antibody was omitted. Sections were mounted onto slides,  
252 cover slipped with VectaShield (Vector Laboratories) and imaged with a Zeiss LSM 800  
253 confocal microscope. Injection of Arch T virus into deep layers of auditory cortex led to  
254 expression of GFP tagged ArchT within 4 weeks in the CT terminals at the level of  
255 medial geniculate body, as shown by colocalization (yellow) (Fig. 1A).

### 256 **Statistical data analysis**

257 Data were collected for MGB single units with  $SAM_{\Delta 100\%}$  or  $SAM_{\Delta 25\%}$  and CT-blockade  
258 as between subject variables. Normality assumptions were met and ANOVA was run to  
259 determine significance at the  $p < 0.05$  level. Bonferroni corrections were utilized for  
260 pairwise comparisons to maintain a type I error level of 5% or less.

261 Responses were analyzed offline. Phase locking ability was evaluated by the standard

262 vector strength (VS) equation:  $VS = \left(\frac{1}{n}\right) * \sqrt{(\sum \cos \varphi_i)^2 + (\sum \sin \varphi_i)^2}$ , where  $n =$  total

263 number of spikes and  $\varphi_i =$  the phase of observed spike relative to modulation frequency

264 (Goldberg & Brown, 1969; Yin *et al.*, 2011). Statistical significance was assessed using

265 the Rayleigh statistic to account for differences in the number of driven spikes, with

266 Rayleigh statistic values greater than 13.8 considered to be statistically significant

267 (Mardia & Jupp, 2000) (Fig. 2). To compare number of units showing phase locking, a

268 Wilcoxon test was used followed by a Bonferroni correction for multiple comparisons.

269 Rate-level functions determined using spike rate in response to BBN were quantified

270 across intensities and compared between control and CT blockade paradigms using

271 repeated measures ANOVA with Bonferroni correction. Spontaneous activity measured

272 using spike rate across 250 ms epochs in 10 ms bins were compared between control

273 and CT blockade paradigms using repeated measures ANOVA with Bonferroni

274 correction. Preliminary analysis involved differences between order of presentation and

275 across stimulus conditions using total spike counts from 10 trials at 10 different  $f_{\text{mods}}$ .  
276 Differences between orders of presentation were compared across random or repeating  
277 presentation of stimuli between SAM $_{\Delta 100\%}$ , SAM $_{\Delta 25\%}$ , and SAM $_{\Delta 25\%}$ +CT blockade  
278 condition using repeated measures ANOVA followed by post-hoc Bonferroni  
279 corrections.

280 Differences between stimulus conditions were compared using a preference ratio (PR)  
281 calculated across all  $f_{\text{mods}}$  (PR = total spikes in repeating trials/total spikes in random  
282 trials). A ratio smaller than 0.95 suggests the unit is a random preferring unit; a ratio  
283 larger than 1.05 suggest the unit is repetition preferring unit; while a ratio between the  
284 range of 0.95 and 1.05 were considered non-selective units (Fig. 3). The rationale for  
285 use of 10 % change in firing as a criteria was based on previous studies (Ghitza *et al.*,  
286 2006; Cai & Caspary, 2015; Cai *et al.*, 2016b). Chi-Square test was used to compare  
287 the PR across conditions.

288 Modulation transfer functions (MTFs) were determined using spike rate (rMTF)  
289 measurements at each  $f_{\text{mod}}$  tested. The rMTF data were used for further quantitative  
290 analyses. A predictable preference index (PPI) was calculated using the area under the  
291 curve (AUC) and the equation:  $\text{PPI} = [(\text{AUC}_{\text{REP}} - \text{AUC}_{\text{RAN}}) / (\text{AUC}_{\text{REP}} + \text{AUC}_{\text{RAN}})]$ , modified  
292 from the novelty response index (Lumani & Zhang, 2010; Cai *et al.*, 2016b). The area  
293 under successive frequency segments of the rMTF curve (AUC) values were based on  
294 rMTF curve calculated using GraphPad Prism. The range of PPI values varied between  
295 -1 to +1: +1 represented a repetition preferring unit response, and -1 represented a  
296 random preferring unit response (Figs. 5 and 6). By calculating the AUC for specific  $f_{\text{mod}}$   
297 ranges, changes between sets of  $f_{\text{mod}}$  could be compared. Repeated-measures ANOVA  
298 followed by post-hoc Tukey correction for multiple comparisons was used to compare  
299 PPI values.

300 Trial-to-trial responses to repeating/predictable SAM presentation showed repetition-  
301 enhancement at temporally challenging (higher frequency)  $f_{\text{mods}}$  ( $f_{\text{mods}}$  128 Hz-1024 Hz)  
302 (Cai *et al.*, 2016b; Kommajosyula *et al.*, 2019). Differences in firing rate trend-line  
303 slopes between the three groups (standard SAM were compared using two-tailed

304 ANCOVA, followed by Friedman test with a post-hoc Wilcoxon test to analyze spike rate  
305 differences at each trial (Fig. 7).

306 Repeated measures ANOVA followed by post-hoc Bonferroni corrections were used to  
307 test statistical significance. Statistical analysis was performed using GraphPad Prism 6  
308 and IBM SPSS version 24. All values are expressed as means  $\pm$  SEM.  $*p < 0.05$ ,  $**p <$   
309  $0.01$ ,  $***p < 0.001$ ,  $****p < 0.0001$ , were treated as statistical significance level.

310

## 311 **Results**

312 Eighty MGB units, responding to sinusoidal amplitude modulation stimuli (SAM) were  
313 recorded from the MGB in awake, passively listening, young-adult FBN rats. Consistent  
314 with previous studies, MGB single-unit responses to SAM stimuli showed band-pass,  
315 low-pass, high-pass, mixed or atypical rMTFs, showing synchronized and  
316 asynchronized or mixed responses (Bartlett & Wang, 2007).

317

### 318 ***Basic response properties with CT blockade***

319 There were no significant changes in spontaneous activity with CT blockade compared  
320 to control condition ( $13.85 \pm 1.27$  vs  $13.26 \pm 1.34$ ,  $n = 45$ ;  $p = 0.282$ ). Rate-level  
321 functions showed significant decreases in responses across intensities with CT  
322 blockade compared to control (Multivariate ANOVA,  $p = 0.040$ ) with significant  
323 differences for comparisons at a couple of intensities (Table 1).

324

### 325 ***Decrease in modulation depth decreases envelope-locking of MGB neurons***

326 Decreasing modulation depth to  $SAM_{\Delta 25\%}$  decreased envelope locking of MGB units  
327 studied relative to  $SAM_{\Delta 100\%}$  stimuli, as measured using the Rayleigh score across  $f_{\text{mods}}$   
328 (2-128 Hz) (Fig. 2). A higher percentage of MGB units showed temporal locking  
329 (Rayleigh statistic  $\geq 13.8$ ) to the standard stimuli ( $SAM_{\Delta 100\%}$ ) than to the  $SAM_{\Delta 25\%}$  stimuli  
330 across  $f_{\text{mods}}$  tested (Table 2). CT blockade did not alter percentages of envelope-locking

331 responses to less-distinct/SAM $_{\Delta 25\%}$  stimuli across  $f_{\text{mods}}$  tested. These data show  
 332 decreased temporal locking in response to SAM $_{\Delta 25\%}$  stimuli and that temporal locking  
 333 was relatively independent of top-down modulation. These results are similar to findings  
 334 showing decreases in temporal locking when adding noise to the SAM periodic  
 335 envelope (Kommajosyula *et al.*, 2019). Here we focus on rate responses of MGB single-  
 336 units and the effect of CT projections on MGB single-unit response properties.

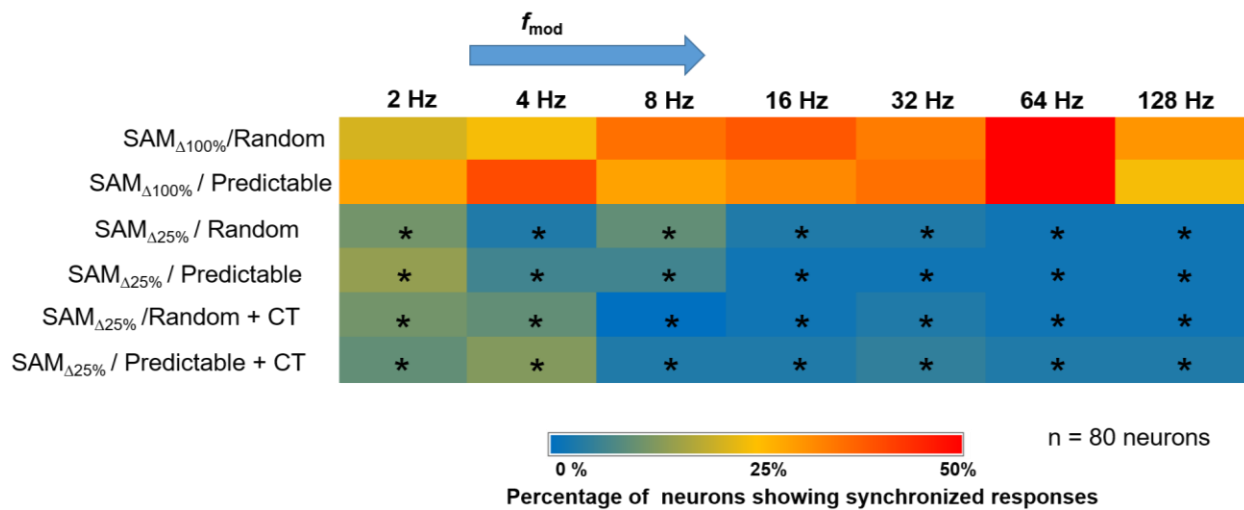

**Fig. 2 Effects of stimulus modulation depth on temporal locking properties of MGB units:** To assess the ability of units to temporally follow the SAM stimulus, the Rayleigh score for each  $f_{\text{mods}}$  (2-128) was used to generate a heat map based on the temporal responses of all 80 MGB units studied. MGB units might lock to a single or multi  $f_{\text{ms}}$  based on the Rayleigh score. Warmth of color indicates the percentage of neurons (out of 80) showing temporal-locking (Rayleigh statistic  $\geq 13.8$ ) to the SAM stimuli. Hot colors (red) indicate a higher percentage of units showing temporal-locking (e.g. SAM $_{\Delta 100\%}$  at 64 Hz  $f_{\text{m}}$ ), whereas cool colors (blue) indicate a lower percentage of units showing temporal locking (e.g. SAM $_{\Delta 25\%}$  at 16 Hz  $f_{\text{m}}$ ). Significant differences were observed between SAM $_{\Delta 100\%}$  and SAM $_{\Delta 25\%}$  regardless of order of presentation, with and without CT blockade (Wilcoxon test followed by Bonferroni correction,  $p < 0.05$ ).

337

338

### 339 **Decreased modulation depth and CT blockade significantly alter MGB unit rate** 340 **response to random vs. repeating SAM**

341 Total spike counts in response to SAM stimuli presented in random or repeating trials  
 342 were compared across stimulus sets with and without CT blockade (standard SAM at  
 343 100% depth of modulation [SAM $_{\Delta 100\%}$ ]), less distinct (SAM at 25% depth of modulation  
 344 [SAM $_{\Delta 25\%}$ ]), less distinct SAM $_{\Delta 25\%}$  + CT blockade) (Fig. 1B and methods for details).  
 345 Consistent with Kommajosyula *et al.* (2019), 66% (56 of 80) MGB units preferred  
 346 randomly presented SAM $_{\Delta 100\%}$  stimuli (Fig. 3A). When modulation depth was reduced to  
 347 SAM $_{\Delta 25\%}$ , there was a significant increase in the percentage of MGB units showing a  
 348 rate preference for repeating stimuli (18% vs. 49%,  $\chi^2(4, N = 80) = 88.789, p =$

349 2.3812E-18) (Fig. 3A&B). This switch in preference toward repeating less distinct  
 350 SAM $_{\Delta 25\%}$  was reversed by CT blockade in MGB (49% vs. 19%,  $\chi^2(4, N = 80) = 84.884$ ,  
 351  $p = 1.6054E-17$ ) (Fig. 3B&C). Following termination of CT optical blockade, MGB unit  
 352 responses returned to showing increased response preference for repeating less  
 353 distinct/SAM $_{\Delta 25\%}$  (19% vs. 39%,  $\chi^2(6, N = 80) = 106.386$ ,  $p = 1.1628E-20$ , data not  
 354 shown).

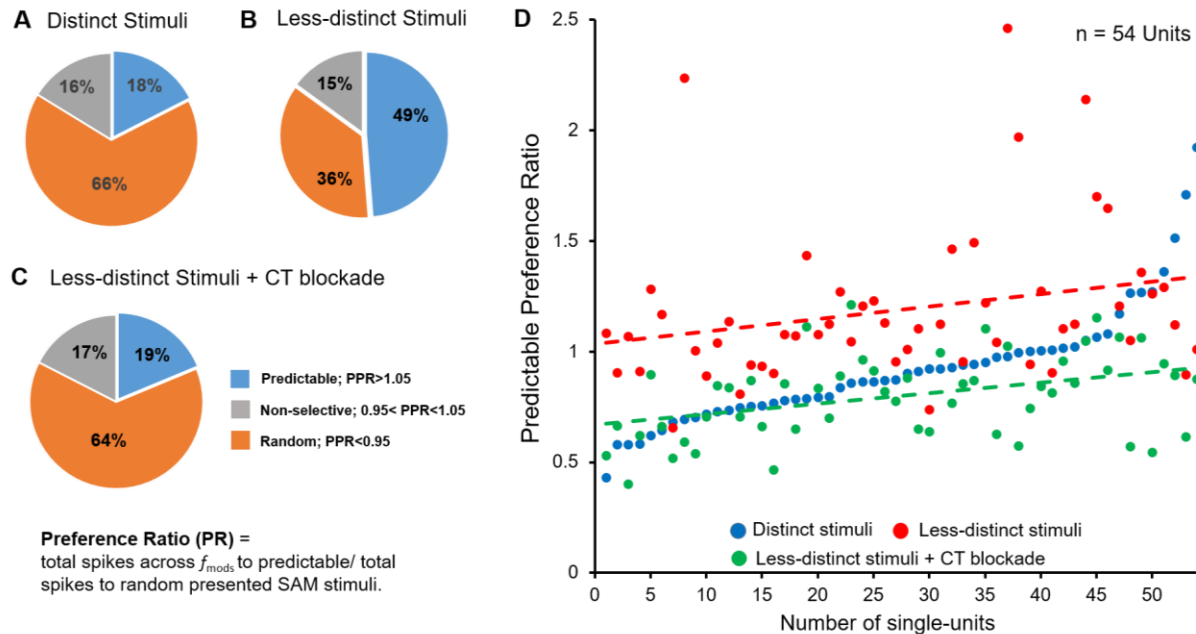

**Fig. 3 Random vs. predictable/repetition preference with and without CT blockade.** Preference ratios (PR) (total spikes to predictable trials/total spikes to random trials) across all  $f_{\text{mods}}$  in response to distinct, less distinct SAM stimuli, less-distinct SAM stimuli with corticothalamic blockade (CT blockade). **A:** Unit recording from awake rat MGB showed a clear preference for random distinct SAM $_{\Delta 100\%}$  stimuli. **B:** Responses to predictable (repeating) SAM stimuli increased from 18% (14/80), to 49% (39/80), in response to SAM $_{\Delta 25\%}$  across  $f_{\text{mods}}$ . **C:** Optical CT blockade reversed the predictable preference of MGB neurons to 19% (14/80), in response to less SAM $_{\Delta 25\%}$  SAM. Significant differences were seen between SAM $_{\Delta 100\%}$  vs. SAM $_{\Delta 25\%}$ , SAM $_{\Delta 25\%}$  vs. SAM $_{\Delta 25\%}$  + CT blockade and SAM $_{\Delta 25\%}$  + CT blockade vs. SAM $_{\Delta 25\%}$  + recovery (Chi-Square test,  $p < 0.05$ ). **D:** PR values plotted on a continuum of increasing PPI values for each of 54 MGB units showing differential responses to distinct, SAM $_{\Delta 100\%}$  (blue dots) vs. less-distinct, SAM $_{\Delta 25\%}$  stimuli (red dots) and SAM $_{\Delta 25\%}$  with CT blockade (green dots). The green trend line shows that CT blockade dramatically decreased the PR in response to SAM $_{\Delta 25\%}$  (red trend-line) approaching the response to SAM $_{\Delta 100\%}$  stimuli (blue dots).

355

356 Ninety percent (72/80) of MGB units changed their PRs toward repeated stimuli in  
 357 response to the switch in modulation depth/CT blockade (change in PR > 0.1). Seventy-  
 358 five percent (54/72) of those units shifted their preference from repeated back to  
 359 random stimuli with CT blockade at SAM $_{\Delta 25\%}$ . The PR scores for each of the 54 MGB  
 360 units were plotted on a continuum of increasing PR score for SAM $_{\Delta 100\%}$ , with PR for  
 361 SAM $_{\Delta 25\%}$  (with or without CT blockade) also plotted for each unit (Fig. 3D). PR trend  
 362 lines show an increase in PR to repeating stimuli when switching from SAM $_{\Delta 100\%}$  to  
 363 SAM $_{\Delta 25\%}$  for most units (Fig. 3D-red line). CT blockade during SAM $_{\Delta 25\%}$  stimuli (green

364 trend line) returns the PR or preference for random stimuli, to levels which approximate  
 365 but are below responses for  $SAM_{\Delta 100\%}$ . Reducing SAM modulation depth increased  
 366 repetition-enhancement in 54/72 neurons, while CT blockade reversed the switch from  
 367 repetition-enhancement to adapting responses (Fig. 3D).

368 The 18 remaining MGB units of the 72 units did not show a change in PR with a  
 369 decrease in SAM temporal distinctiveness ( $SAM_{\Delta 100\%}$  to  $SAM_{\Delta 25\%}$ ) but showed increase  
 370 in PR, or a preference for repeated stimuli when switched to  $SAM_{\Delta 25\%}$  with optical CT  
 371 blockade. Eight MGB neurons unresponsive to optical blockade were not included in the  
 372 analysis.

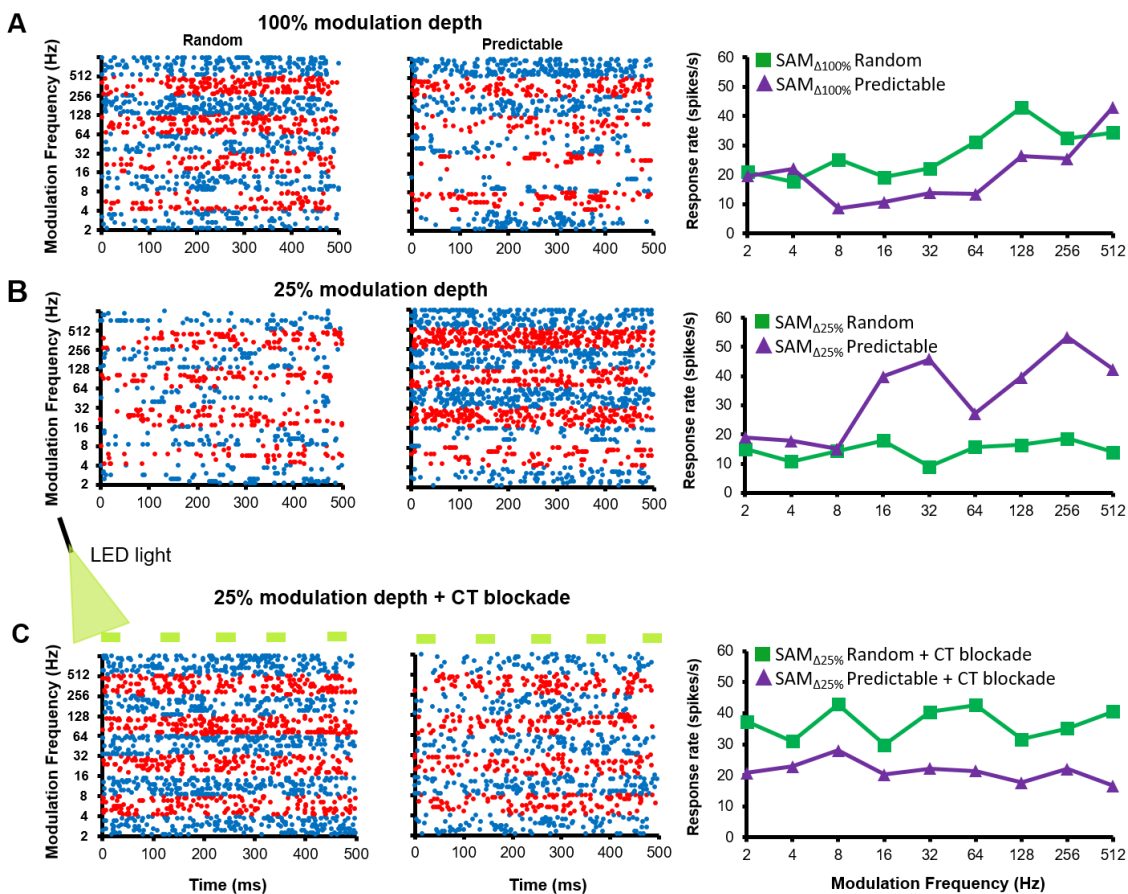

**Fig. 4 Exemplar MGB unit showing differential responses to SAM presentation order, modulation depth and CT blockade:** **A.** a representative MGB unit showing a higher discharge rate (spikes/sec) to randomly presented  $SAM_{\Delta 100\%}$  across  $f_{mods}$  than to predictable/repeating  $SAM_{\Delta 100\%}$  stimuli in dot raster and rate-modulation transfer functions (rMTFs). **B.** When modulation depth was decreased to  $SAM_{\Delta 25\%}$ , less distinct stimuli, the same MGB unit showed increased/greater responses to a predictable/repeating SAM, especially at higher  $f_{ms}$ . **C.** Optical blockade of CT input resulted in a return to strong random preference even in response to less distinct stimuli,  $SAM_{\Delta 25\%}$  in this same exemplar.

373

374 Changes in response to modulation depth and CT blockade are shown for an exemplar  
375 MGB unit (Fig.4). Switching to less-distinct  $SAM_{\Delta 25\%}$  showed a two-fold increase in  
376 responses to repeating trials across a range of modulation frequencies, which was  
377 reversed by CT blockade (Fig. 4B&C).

378 Since PR does not differentiate differences across  $f_{\text{mods}}$ , we calculated the predictable  
379 preference index (PPI), a quantitative measure derived from area under the curve  
380 (AUC) values across groups of modulation frequencies,  $PPI = [(AUC_{\text{REP}} - AUC_{\text{RAN}}) /$   
381  $(AUC_{\text{REP}} + AUC_{\text{RAN}})]$ . Higher PPI values indicate increased preference for repeating  
382 trials, while lower PPI values indicate a preference for randomly presented trials. PPI  
383 values were lower for standard stimuli ( $SAM_{\Delta 100\%}$ ) across all  $f_{\text{mods}}$  tested (Fig. 5A).  
384 Seventy-nine percent of MGB units (56/71) showed increased PPI value with decreased  
385 modulation depth ( $SAM_{\Delta 25\%}$ ), indicating repetition-enhancement. CT blockade during  
386 presentation of  $SAM_{\Delta 25\%}$  reversed the notable increase in PPI (repeated measures  
387 ANOVA,  $F(2, 165) = 39.512$ ,  $p = 2.682E-11$ , Bonferroni corrected p-values (standard vs.  
388 less-salient = 0.000001;  $SAM_{\Delta 25\%}$  vs.  $SAM_{\Delta 25\%} + \text{CT blockade} = 1.4624E-11$ ;  $SAM_{\Delta 100\%}$   
389 vs.  $SAM_{\Delta 25\%} + \text{CT blockade} = 0.019$ ) (Fig. 5A). Changes in PPI were determined for  
390 sets of increasing  $f_{\text{mods}}$  across different stimulus groups (Fig. 5B).  $SAM_{\Delta 25\%}$  significantly  
391 increased PPI values and these changes were more pronounced at higher  $f_{\text{mods}}$ . CT  
392 blockade significantly decreased PPI values across  $f_{\text{mods}}$  (Fig. 5B). At  $f_{\text{mods}}$  between  
393 256-1024 Hz, PPI values were significantly decreased by CT blockade even when  
394 compared to standard,  $SAM_{\Delta 100\%}$  stimuli (Table 3 for repeated measures ANOVA,  
395 Bonferroni corrected p-values and comparisons at each  $f_{\text{m}}$  range) (Fig. 5B). These  
396 results suggest that MGB responses to standard,  $SAM_{\Delta 100\%}$  stimuli show a degree of CT  
397 influences at the higher  $f_{\text{mods}}$  tested. For 13 single-units, the effects of CT blockade at  
398  $SAM_{\Delta 100\%}$  was tested in responses to sequential/repeating trails with and without CT  
399 blockade. There were no significant differences in spike rates ( $SAM_{\Delta 100\%}$  vs.  $SAM_{\Delta 100\%} +$   
400  $\text{CT blockade} = 17.62615 \pm 3.52428$  vs.  $15.2132 \pm 2.9107$ ,  $p = 0.0529$ , T-test) and for  
401 PPI values between the two conditions across all  $f_{\text{mods}}$  ( $SAM_{\Delta 100\%}$  vs.  $SAM_{\Delta 100\%} + \text{CT}$   
402  $\text{blockade} = -0.03926 \pm 0.0393$  vs.  $-0.03136 \pm 0.0316$ ,  $p = 0.8611$ , T-test). This results  
403 supports the hypothesis that additional top-down resources were engaged by temporally  
404 less distinct SAM stimuli.



405 The 15 MGB units that did not show PPI changes in modulation depth paradoxically  
 406 showed significantly increased PPI values with CT blockade, across  $f_{mod}$ s examined  
 407 (Table 4).

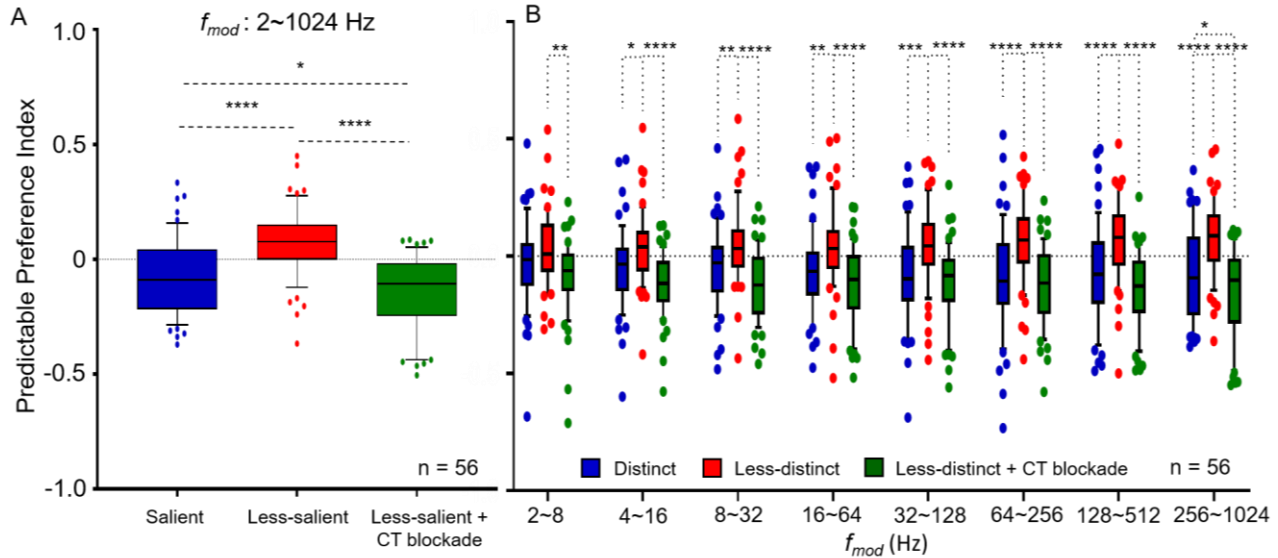

408 **Fig. 5 Predictable preference index (PPI) for MGB unit's sensitive to stimulus depth of modulation:** PPI's were calculated (see text) for MGB responses to random and predictable  
 409 trials across all  $f_{mod}$ s combined and for specific subsets of  $f_{mod}$ s. **A.** For all  $f_{mod}$ s combined, MGB units ( $n = 56$ ) showed significant increases in PPI values (red bar) when switching from  
 410 SAM $_{\Delta 100\%}$  to less distinct SAM $_{\Delta 25\%}$  stimuli (blue bar). The observed increase in PPI was reversed (green bar) with corticothalamic (CT) blockade. **B.** PPI values for MGB neurons showed  
 411 significantly increased PPIs to SAM $_{\Delta 25\%}$  especially at higher  $f_{mod}$ s with CT blockade reversing these increases. (Data are presented as the mean  $\pm$  SEM; repeated-measures ANOVA  
 412 followed by *post hoc* Tukey's correction were used for analyses (Graphpad). \* $p < 0.05$ ; \*\* $p < 0.01$ ; \*\*\* $p < 0.001$ ; \*\*\*\* $p < 0.0001$ .)

408

409

### 410 **Trial by trial analysis**

411 Based on the PPI results (Fig. 5) suggesting that sensory responses were adapting and  
 412 top-down MGB inputs caused repetition-enhancement, we examined trial-by-trial data to  
 413 10 successive presentations of SAM stimuli, for the 21 MGB units with the highest PPI  
 414 values ( $> 0.3$ ) at  $f_{mod}$ s that showed the largest changes (Fig. 7). Group data for repeating  
 415 presentations of SAM stimuli (128 Hz and 256 Hz  $f_{mod}$ ) showed clear adaptation across  
 416 trials for SAM $_{\Delta 100\%}$ , while reducing SAM depth changed the slope to repetition-  
 417 enhancement. CT blockade reversed the trial-by-trial repetition-enhancement in  
 418 response to repeating SAM $_{\Delta 25\%}$  stimuli (Fig. 7A&B). Trend line slopes for average spikes  
 419 were significantly different across the three conditions for repeating presentation at 128  
 420 Hz  $f_{mod}$  ( $F(2,24) = 4.885$ .  $p = 0.0166$ ). Differences were significant for individual trials 7,  
 421 8, 9 and 10 between less-distinct and less-distinct with CT blockade (Friedman test

422 followed Wilcoxon test and respective  $p$ -values for each trial are mentioned: (trial 7,  $p =$   
 423 0.0021; trial 8,  $p = 0.0011$ ; trial 9,  $p = 0.0027$ ; trial 10,  $p = 0.009$ ) (Fig. 7A). Responses  
 424 to a repeating SAM ( $f_{mod}$  256 Hz) significantly adapted to  $SAM_{\Delta 100\%}$  stimuli, while  
 425 increasing responses across trials to  $SAM_{\Delta 25\%}$ , which was reversed by CT blockade  
 426 (ANCOVA, two-tailed,  $F(2,24) = 6.527$ ,  $p = 0.0055$ ). Differences were significant for all  
 427 trials but trial 2 between  $SAM_{\Delta 25\%}$  to  $SAM_{\Delta 25\%}$  with CT blockade (Friedman test followed  
 428 Wilcoxon test and respective  $p$ -values for each trial are mentioned: (trial 1,  $p = 0.006$ ;  
 429 trial 3,  $p = 0.00018$ ; trial 4,  $p = 0.00046$ ; trial 5,  $p = 0.0002$ ; trial 6,  $p = 0.0018$ ; trial 7,  $p =$   
 430 0.0034; trial 8,  $p = 0.0013$ ; trial 9,  $p = 0.0004$ ; trial 10,  $p = 0.038$ )) (Fig. 7B). The same  
 431 trends were seen for trial-by-trial spike rate comparisons for  $f_{mods}$  512 and 1024 Hz. The  
 432 impact of onset responses on trial-by-trial rate data was examined by removing the first  
 433 50 ms. There were no significant differences in these data with or without inclusion of 50  
 434 ms onset across the three stimulus conditions (data not shown).

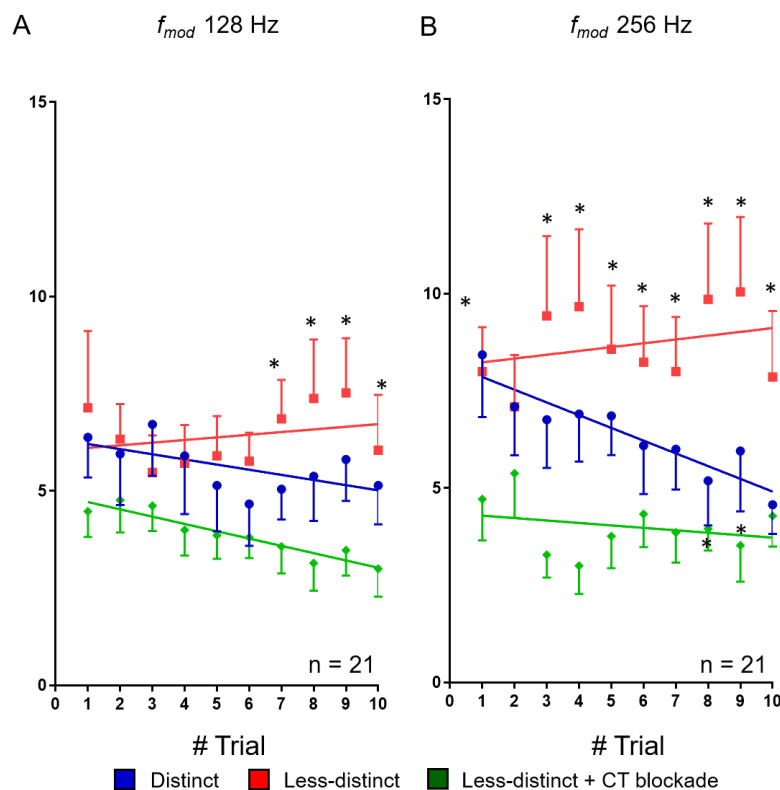

Fig. 7 Trial-by-trial response analysis to  $SAM_{\Delta 100\%}$  to  $SAM_{\Delta 25\%}$  with and without corticothalamic (CT) blockade. Single-units showing PPI changes larger than 0.3 at high  $f_{mods}$  when switch from  $SAM_{\Delta 100\%}$  to  $SAM_{\Delta 25\%}$  are included in the trial by trial analysis. Group ( $n = 21$ ) trial-by-trial responses to predictable SAM at  $f_{mods}$  128Hz (A) and 256Hz (B). These units show adapting responses to 10 presentations of repeating salient  $SAM_{\Delta 100\%}$  stimuli (blue dot). Decreasing SAM modulation depth switched the trial-by-trial responses from adapting to predictable with spikes increasing with each successive presentation of the  $SAM_{\Delta 25\%}$  stimulus (red dot). Optical CT blockade reversed the predictive response (green dot). Trend line slopes were significantly different for the three conditions for average spikes to predictable presentation of at  $f_{mod}$  128 Hz (A, ANCOVA, two-tailed,  $p < 0.05$ ). Differences were significant at individual trial 7, 8, 9 and 10 in between  $SAM_{\Delta 25\%}$  and  $SAM_{\Delta 25\%}$  + CT stimulus conditions ( $p < 0.05$ , Friedman test followed Wilcoxon test) (A). Similarly, Trend line slopes were significantly different for the three conditions for average spikes to predictable presentation at  $f_{mod}$  256 Hz (B) (ANCOVA, two-tailed,  $p < 0.05$ ). Differences were significantly different at trial 1, 3, 4, 5, 6, 7, 8, 9, and 10 between  $SAM_{\Delta 25\%}$  vs.  $SAM_{\Delta 25\%}$  with CT blockade. There were significant differences between  $SAM_{\Delta 100\%}$  and  $SAM_{\Delta 25\%}$  stimuli at trial 8 and 9 in their firing rates (B) ( $p < 0.05$ , Friedman test followed Wilcoxon test).

435

436

437

## 438 **MGB subdivisions**

439 PPI values across  $f_{\text{mods}}$  were examined for all 80 units based on their location within the  
 440 major MGB subdivisions (Fig. 6). PPI values were significantly increased in ventral and  
 441 dorsal MGB when modulation depth was reduced from  $\text{SAM}_{\Delta 100\%}$  to  $\text{SAM}_{\Delta 25\%}$  (Fig.6).  
 442 Corticothalamic blockade reversed the PPI changes in the dorsal division with a trend  
 443 toward reversal in the ventral MGB (repeated measures ANOVA  $F(1.714, 132) = 8.562$ ,  
 444  $p = 0.0006$ , Bonferroni corrected p-values across all  $f_{\text{ms}}$  in ventral division ( $\text{SAM}_{\Delta 100\%}$  to  
 445  $\text{SAM}_{\Delta 25\%} = 0.0002$ ;  $\text{SAM}_{\Delta 25\%}$  to  $\text{SAM}_{\Delta 25\%} + \text{CT blockade} = 0.0859$ ;  $\text{SAM}_{\Delta 100\%}$  to  $\text{SAM}_{\Delta 25\%}$   
 446  $+ \text{CT blockade} = 0.5902$ ); Bonferroni corrected p-values across all  $f_{\text{ms}}$  in dorsal division  
 447 ( $\text{SAM}_{\Delta 100\%}$  to  $\text{SAM}_{\Delta 25\%} = 0.0389$ ;  $\text{SAM}_{\Delta 25\%}$  to  $\text{SAM}_{\Delta 25\%} + \text{CT blockade} = 0.0012$ ;  
 448  $\text{SAM}_{\Delta 100\%}$  to  $\text{SAM}_{\Delta 25\%} + \text{CT blockade} = 0.5146$ ); Fig. 6). None of these changes were  
 449 significant in the medial division of the MGB (Bonferroni corrected p-values across all  
 450  $f_{\text{ms}}$  in medial division ( $\text{SAM}_{\Delta 100\%}$  to  $\text{SAM}_{\Delta 25\%} = 0.1541$ ;  $\text{SAM}_{\Delta 25\%}$  to  $\text{SAM}_{\Delta 25\%} + \text{CT}$   
 451 blockade = 0.9971;  $\text{SAM}_{\Delta 100\%}$  to  $\text{SAM}_{\Delta 25\%} + \text{CT blockade} = 0.3117$ ; Fig. 6).

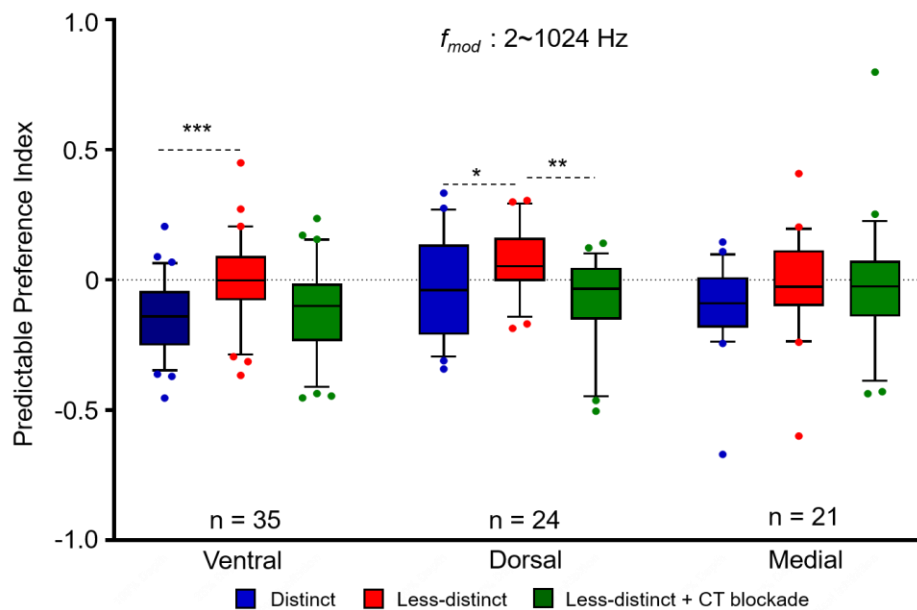

**Fig. 6 MGB region specific changes in predictable preference index (PPI) for unit's sensitive to stimulus depth of modulation:** PPI's were calculated (see text) for MGB units located in the three major divisions of the MGB. Responses to random vs. predictable SAM across all  $f_{\text{mods}}$  combined with and without CT blockade. Across  $f_{\text{mods}}$ , dorsal (24) and ventral (39), MGB units showed significant increases in PPI values (red bar) when switching from  $\text{SAM}_{\Delta 100\%}$  to  $\text{SAM}_{\Delta 25\%}$ . Corticothalamic (CT) blockade reversed this significant increase for dorsal and ventral MGB units. These changes were not observed in the medial division. Data are presented as the mean  $\pm$  SEM; repeated-measures ANOVA followed by *post hoc* Tukey's correction were used for analyses (Graphpad). \* $p < 0.05$ ; \*\* $p < 0.01$ ; \*\*\* $p < 0.001$ .

452

## 453 **Spike-rate changes with altered SAM modulation depth and CT blockade**

454 Across 80 neurons there were significant changes between  $\text{SAM}_{\Delta 100\%}$  and  $\text{SAM}_{\Delta 25\%}$  in  
 455 total spikes in response to both random and repeated trials of stimuli across  $f_{\text{mods}}$ ,

456 (Table 5). No significant differences in total spikes between  $SAM_{\Delta 25\%}$  and  $SAM_{\Delta 25\%} +$   
457 CT blockade were noted for randomly presented trials (Table 5). For repeating trials  
458 across  $f_{\text{mods}}$ , a switch from  $SAM_{\Delta 100\%}$  to  $SAM_{\Delta 25\%}$  showed no significant differences in  
459 total spikes ( $731.3 \pm 46.3$  vs.  $693.5 \pm 45.1$ ) (Table 5). However, a significant decrease in  
460 total spikes was noted when repeating trials across  $f_{\text{mod}}$  were switched from  $SAM_{\Delta 100\%}$  to  
461  $SAM_{\Delta 25\%}$  to  $SAM_{\Delta 25\%} +$  CT blockade (Table 5).

462

## 463 Discussion

464 Previous studies found that both aging and decreased modulation depth, presumptively  
465 reducing the salience/fidelity of the ascending temporal code, increased responses to a  
466 repeating modulated signal, suggesting engagement of top-down, cognitive and  
467 mnemonic resources (Cai *et al.*, 2016b; Kommajosyula *et al.*, 2019). The present study  
468 used optogenetic CT blockade to test whether repetition-enhancement in response to  
469 less distinct temporal stimuli was due to the increased involvement of top-down CT  
470 resources. In order to maintain speech understanding, older individuals have been  
471 shown to increase use of cognitive and memory resources (Bidelman *et al.*, 2019a;  
472 Roque *et al.*, 2019). The impact of aging can be simulated in humans and in animal  
473 models by decreasing the temporal clarity of the stimulus. Reducing modulation depth  
474 of a SAM stimulus changes the rate and synchrony of the up-stream code introducing  
475 temporal jitter (Pichora-Fuller *et al.*, 2007; Malone *et al.*, 2010; Dimitrijevic *et al.*, 2016;  
476 Mamo *et al.*, 2016). A less temporally distinct ascending acoustic code is thought to  
477 engage top-down cognitive resources by generating predictions to support decoding of  
478 modulated speech-like signals (Peelle & Wingfield, 2016; Pichora-Fuller *et al.*, 2017;  
479 Caspary & Llano, 2018; Recanzone, 2018). Consistent with human and animal studies,  
480 the present study finds that weakening periodicity cues by decreasing modulation depth  
481 ( $SAM_{\Delta 100\%}$  to  $SAM_{\Delta 25\%}$ ) decreased the percentage of neurons showing temporal phase-  
482 locking to the SAM envelope (Pichora-Fuller *et al.*, 2007; Malone *et al.*, 2010;  
483 Parthasarathy & Bartlett, 2011; Mamo *et al.*, 2016; Kommajosyula *et al.*, 2019;  
484 McClaskey *et al.*, 2019). Previously we found that jittering the SAM envelope with a  
485 1.0kHz centered noise produced similar levels of repetition-enhancement to the

486 SAM $_{\Delta 25\%}$  used in the present study (Kommajosyula *et al.*, 2019).) CT blockade did not  
487 alter temporal locking of units to the SAM $_{\Delta 25\%}$ . The lack of CT blockade changes on  
488 temporal locking contrasts to changes observed in SAM rate coding suggesting that CT  
489 projections do not play a significant role in temporal coding using this stimulus paradigm  
490 (Bartlett & Wang, 2007; Felix *et al.*, 2018).

491 In response to repeating modulated stimuli, decreasing temporal clarity by decreasing  
492 modulation depth changed single unit rate responses from adapting to responses  
493 showing repetition-enhancement to the repeating modulated SAM stimulus. The switch  
494 to increasing responses to less temporally distinct repeating stimuli was  
495 blocked/reversed by optical inhibition of CT projections, thought to provide top-down  
496 resources to the MGB (Homma *et al.*, 2017; Parras *et al.*, 2017). A majority of MGB  
497 units showed the largest increases in repetition enhancement at higher SAM  $f_{\text{mod}}$  rates  
498 (> 128 Hz).

499

### 500 ***Temporal distinction and top-down resource usage***

501 The present study used SAM $_{\Delta 25\%}$ , as a surrogate for a diminished acoustic cue that is  
502 poorly detected and discriminated in the ascending code in human and animal models  
503 of aging (Strouse *et al.*, 1998; Nelson & Carney, 2006; Harris & Dubno, 2017). These  
504 findings are also consistent with studies modeling aging in young humans with normal  
505 hearing and studies of auditory processing of less-distinct stimuli that reveal perceptual  
506 deficits due to decrease precision of temporal coding (Shannon *et al.*, 1995; Krishna &  
507 Semple, 2000; Pichora-Fuller *et al.*, 2007; Malone *et al.*, 2010; Jorgensen & Dau, 2011;  
508 Parthasarathy & Bartlett, 2011; Dimitrijevic *et al.*, 2016; Anderson *et al.*, 2020; Erb *et al.*,  
509 2020).

510 Previous studies suggest that salience is multidimensional, nonlinear and context-  
511 dependent (Kayser *et al.*, 2005; Huang & Elhilali, 2017). Based on the context, cortical  
512 structures generate predictions of the upcoming sensory stimuli as postulated by  
513 predictive coding theory (Mumford, 1992; Koelsch *et al.*, 2019). If the prediction and  
514 ascending sensory signals do not match, a prediction error should be generated

515 (Auksztulewicz & Friston, 2016). Prediction error is a mechanism to strengthen the  
516 internal representation of less temporally distinct stimuli which may lead to generation of  
517 a better prediction upon the next repetition (Rao & Ballard, 1999). Studies have  
518 suggested increased use of predictive coding in order to cope with less-distinct stimuli  
519 or aging accompanied by a less temporally distinct signal to noise ratio (Heinemann *et al.*,  
520 *et al.*, 2011; Peelle & Wingfield, 2016; Bidelman *et al.*, 2019a; Bidelman *et al.*, 2019b;  
521 Presacco *et al.*, 2019; Price *et al.*, 2019; Saderi *et al.*, 2020). Electrophysiological and  
522 fMRI studies suggest a role for repetition suppression/adaptation to repeating stimuli in  
523 support of image sharpening and perceptual priming (Gross *et al.*, 1967; Dolan *et al.*,  
524 1997; James *et al.*, 2000; Grill-Spector *et al.*, 2006; Näätänen *et al.*, 2007). The present  
525 findings suggest that for a sensory signal whose features are unclear, adaptation would  
526 be counterproductive, whereas repetition-enhancement could potentially facilitate  
527 identification of the unclear signal and its characteristics.

528 The present findings and two prior studies strongly support the idea of CT-mediated  
529 transmission of intracortical signals leading to repetition-enhancement (Cai *et al.*,  
530 2016b; Kommajosyula *et al.*, 2019). Nearly 80% (56/71) of the neurons showed  
531 increases in PR, indicating relative increases in unit responses to a repeating stimulus,  
532 especially at higher  $f_{\text{mods}}$ . MGB units showing the largest repetition enhancement effects  
533 (PPI > 0.3) showed increases in firing rates with each successive repeating trial of less-  
534 distinct stimuli at higher  $f_{\text{mods}}$  (Fig. 7). SSA studies using short tone-burst stimuli show  
535 significantly less adaptation across trials in awake animals, suggesting that top-down  
536 projections may reduce SSA in IC and MGB as suggested in the present study and  
537 (Antunes *et al.*, 2010; Richardson *et al.*, 2013; Ayala *et al.*, 2015; Duque & Malmierca,  
538 2015; Cai *et al.*, 2016a; Yaron *et al.*, 2020). The increase in discharge rate with  
539 repetition is best explained by a buildup in the strength of the top-down/CT-mediated  
540 contribution to the MGB response (Fig. 8B). This is supported by significant decreases  
541 in the preference ratios (Figs. 3&5), and trial-by-trial enhancement (Fig. 7) which could  
542 be blocked during repeating SAM $_{\Delta 25\%}$  stimuli. The level of adaptation seen with CT  
543 blockade during less-distinct stimuli was comparable or greater than seen with the  
544 SAM $_{\Delta 100\%}$  stimuli (Figs. 4&5) suggesting blockade of an some on-going level of top-  
545 down resource engagement even during a temporally clear SAM $_{\Delta 100\%}$  stimulus. We

546 suggest that CT blockade reduces the ability to convey cortical estimates of the stimulus  
 547 to MGB neurons, rendering the MGB neurons less sensitive to mismatch/prediction  
 548 error. (Fig. 8C).

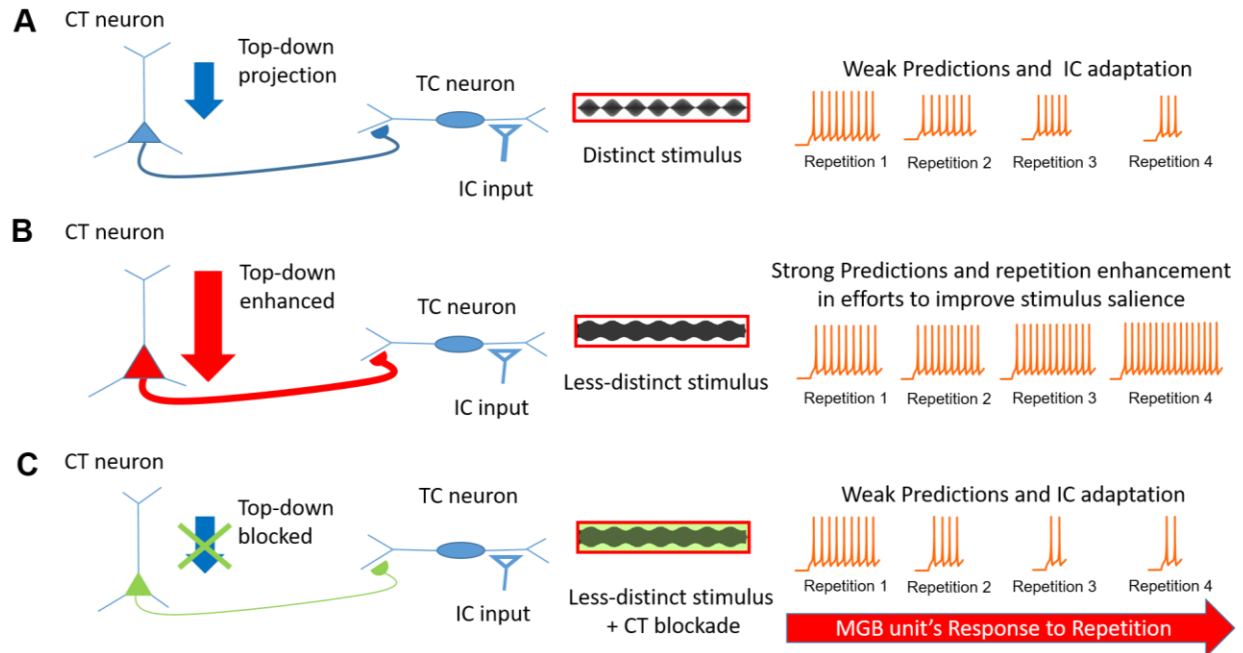

Fig. 8 Saliency based generation of prediction errors in auditory thalamus: An upcoming sensory signal from inferior colliculus (IC) at the level of medial geniculate body (MGB) could interact with a top-down prediction from cortex, and generate prediction error component. The upcoming sensory signals (spikes) generated in response to distinct stimuli, are matched by the top-down predictions and hence little to less generation of prediction error component upon repetition of the distinct stimuli (A). The spike signals to weakly modulated stimuli fail to match the predictions, hence generation of prediction error increases upon repetition until the occurrence of a correct prediction based on the new internal representation formed by feedback from previous prediction error signals. This phenomenon is observed as an increase in response to each repetition (repetition enhancement) (B). CT blockade with weakly modulated stimuli, leads to blockade of delivery of predictions to MGB, and possibly erroneous prediction error signals and adaptive spike responses (C).

549

550 Significant changes in PPI were found in the ventral and dorsal MGB divisions, but not  
 551 the medial subdivision of the MGB (Fig. 4). The absence of significant changes in the  
 552 medial subdivision reflect the differential inputs, intrinsic properties and/or connectivity  
 553 patterns of dorsal MGB neurons, such that they receive different and more widespread  
 554 CT projections (Smith *et al.*, 2007). However, some caution should be exercised in the  
 555 interpretation of the subdivision findings since recorded neurons were not dye marked  
 556 and absolute location was only approximated using a template (see methods).

557 In conclusion, we found that less temporally distinct stimuli increased the  
 558 preference for repeating modulated signals, i.e. emergence of repetition-enhancement,  
 559 while blockade of CT projections led to reversal of this effect. In traditional predictive  
 560 coding theory, an error signal between cortical prediction and incoming sensory inputs

561 generates spiking activity that diminishes as the sensory and prediction templates  
562 match, with the mechanisms of this operation not fully understood. The present results  
563 are consistent with the idea that a less-distinct acoustic signal leads to the generation of  
564 a prediction component similar to what might be seen with phonemic restoration  
565 (Bologna *et al.*, 2018; Jaekel *et al.*, 2018). Corticothalamic feedback to MGB may serve  
566 to amplify weak but predictable features in order to generate a more reliable stimulus  
567 template for subsequent predictions, leading to improved detection of changes. We  
568 suggest that CT blockade led to a decrease in higher order/top-down information  
569 received by MGB neurons, leading to a decrease in corticothalamic mediated repetition-  
570 enhancement.

571

572 **Author contribution:** SPK: Study concept, design, data acquisition, analyses,  
573 interpretation, manuscript drafting, and revision; ELB: Data analyses, interpretation and  
574 manuscript revision; LL: Confocal imaging, surgical assistance and manuscript revision;  
575 RC: Study concept and manuscript revision; DMC: Study concept, design, supervision,  
576 data interpretation and manuscript writing and revision. SPK's present address:  
577 Department of Pharmacy, Birla Institute of Technology and Science, Pilani, Hyderabad  
578 Campus, Telangana, 500078, India

579

580 **Conflict of interest:**

581 The authors declare no competing financial interests

582 **Acknowledgements:**

583 This work was supported by National Institute on Deafness and Other Communication  
584 Disorders DC000151 to D.M.C. We thank the National Institute on Aging for providing  
585 FBN rats; Kevin Brownell for data reduction, Dr. Kristin Delfino for statistical analysis;  
586 Dr. Ken Hancock for design and continued development of our stimulus/acquisition  
587 system, Lydia Howes for proof reading and Dr. Laurel Carney for suggestions on an  
588 earlier version of the manuscript.

589



## 590 References

- 591 Anderson LA & Malmierca MS. (2013). The effect of auditory cortex deactivation on stimulus-specific  
592 adaptation in the inferior colliculus of the rat. *The European journal of neuroscience* **37**, 52-62.
- 593  
594 Anderson S & Karawani H. (2020). Objective evidence of temporal processing deficits in older adults.  
595 *Hear Res* **397**, 108053.
- 596  
597 Anderson S, Roque L, Gaskins CR, Gordon-Salant S & Goupell MJ. (2020). Age-Related Compensation  
598 Mechanism Revealed in the Cortical Representation of Degraded Speech. *J Assoc Res*  
599 *Otolaryngol* **21**, 373-391.
- 600  
601 Antunes FM, Nelken I, Covey E & Malmierca MS. (2010). Stimulus-Specific Adaptation in the Auditory  
602 Thalamus of the Anesthetized Rat. *PloS one* **5**, e14071.
- 603  
604 Auksztulewicz R & Friston K. (2016). Repetition suppression and its contextual determinants in  
605 predictive coding. *Cortex* **80**, 125-140.
- 606  
607 Ayala YA, Udeh A, Dutta K, Bishop D, Malmierca MS & Oliver DL. (2015). Differences in the strength of  
608 cortical and brainstem inputs to SSA and non-SSA neurons in the inferior colliculus. *Scientific*  
609 *reports* **5**, 10383.
- 610  
611 Bartlett EL. (2013). The organization and physiology of the auditory thalamus and its role in processing  
612 acoustic features important for speech perception. *Brain Lang* **126**, 29-48.
- 613  
614 Bartlett EL, Stark JM, Guillery RW & Smith PH. (2000). Comparison of the fine structure of cortical and  
615 collicular terminals in the rat medial geniculate body. *Neuroscience* **100**, 811-828.
- 616  
617 Bartlett EL & Wang X. (2005). Long-lasting modulation by stimulus context in primate auditory cortex.  
618 *Journal of neurophysiology* **94**, 83-104.
- 619  
620 Bartlett EL & Wang X. (2007). Neural representations of temporally modulated signals in the auditory  
621 thalamus of awake primates. *J Neurophysiol* **97**, 1005-1017.
- 622  
623 Başkent D, Clarke J, Pals C, Benard MR, Bhargava P, Saija J, Sarampalis A, Wagner A & Gaudrain E.  
624 (2016). Cognitive Compensation of Speech Perception With Hearing Impairment, Cochlear  
625 Implants, and Aging: How and to What Degree Can It Be Achieved? *Trends Hear* **20**,  
626 2331216516670279.
- 627

- 628 Bidelman GM, Mahmud MS, Yeasin M, Shen D, Arnott SR & Alain C. (2019a). Age-related hearing loss  
629 increases full-brain connectivity while reversing directed signaling within the dorsal-ventral  
630 pathway for speech. *Brain Struct Funct* **224**, 2661-2676.
- 631  
632 Bidelman GM, Price CN, Shen D, Arnott SR & Alain C. (2019b). Afferent-efferent connectivity between  
633 auditory brainstem and cortex accounts for poorer speech-in-noise comprehension in older  
634 adults. *Hear Res* **382**, 107795.
- 635  
636 Bigelow J, Morrill RJ, Dekloe J & Hasenstaub AR. (2019). Movement and VIP Interneuron Activation  
637 Differentially Modulate Encoding in Mouse Auditory Cortex. *eNeuro* **6**, ENEURO.0164-  
638 0119.2019.
- 639  
640 Bologna WJ, Vaden Jr KI, Ahlstrom JB & Dubno JR. (2018). Age effects on perceptual organization of  
641 speech: Contributions of glimpsing, phonemic restoration, and speech segregation. *The Journal*  
642 *of the Acoustical Society of America* **144**, 267-281.
- 643  
644 Cai R & Caspary DM. (2015). GABAergic inhibition shapes SAM responses in rat auditory thalamus.  
645 *Neuroscience* **299**, 146-155.
- 646  
647 Cai R, Montgomery SC, Graves KA, Caspary DM & Cox BC. (2018). The FBN rat model of aging:  
648 investigation of ABR waveforms and ribbon synapse changes. *Neurobiology of aging* **62**, 53-63.
- 649  
650 Cai R, Richardson BD & Caspary DM. (2016a). Responses to Predictable versus Random Temporally  
651 Complex Stimuli from Single Units in Auditory Thalamus: Impact of Aging and Anesthesia. *J*  
652 *Journal of Neuroscience* **36**, 10696-10706.
- 653  
654 Cai R, Richardson BD & Caspary DM. (2016b). Responses to Predictable versus Random Temporally  
655 Complex Stimuli from Single Units in Auditory Thalamus: Impact of Aging and Anesthesia. *J*  
656 *Neurosci* **36**, 10696-10706.
- 657  
658 Caspary DM, Ling L, Turner JG & Hughes LF. (2008). Inhibitory neurotransmission, plasticity and aging in  
659 the mammalian central auditory system. *The Journal of experimental biology* **211**, 1781-1791.
- 660  
661 Caspary DM & Llano DA. (2018). Aging Processes in the Subcortical Auditory System. In *The Oxford*  
662 *Handbook of the Auditory Brainstem*, ed. Kandler K. Oxford University Press.
- 663  
664 Davis MH, Ford MA, Kherif F & Johnsrude IS. (2011). Does semantic context benefit speech  
665 understanding through "top-down" processes? Evidence from time-resolved sparse fMRI. *J Cogn*  
666 *Neurosci* **23**, 3914-3932.
- 667

- 668 de Gardelle V, Waszczuk M, Egnér T & Summerfield C. (2013). Concurrent repetition enhancement and  
669 suppression responses in extrastriate visual cortex. *Cerebral cortex* **23**, 2235-2244.
- 670
- 671 Diaz B, Hintz F, Kiebel SJ & von Kriegstein K. (2012). Dysfunction of the auditory thalamus in  
672 developmental dyslexia. *Proceedings of the National Academy of Sciences of the United States of*  
673 *America* **109**, 13841-13846.
- 674
- 675 Dimitrijevic A, Alsamri J, John MS, Purcell D, George S & Zeng F-G. (2016). Human Envelope Following  
676 Responses to Amplitude Modulation: Effects of Aging and Modulation Depth. *Ear and hearing*  
677 **37**, e322-e335.
- 678
- 679 Dolan RJ, Fink GR, Rolls E, Booth M, Holmes A, Frackowiak RSJ & Friston KJ. (1997). How the brain learns  
680 to see objects and faces in an impoverished context. *Nature* **389**, 596-599.
- 681
- 682 Dubno JR, Dirks DD & Morgan DE. (1984). Effects of age and mild hearing loss on speech recognition in  
683 noise. *The Journal of the Acoustical Society of America* **76**, 87-96.
- 684
- 685 Duque D & Malmierca MS. (2015). Stimulus-specific adaptation in the inferior colliculus of the mouse:  
686 anesthesia and spontaneous activity effects. *Brain structure & function* **220**, 3385-3398.
- 687
- 688 Erb J, Schmitt LM & Obleser J. (2020). Temporal selectivity declines in the aging human auditory cortex.  
689 *eLife* **9**.
- 690
- 691 Felix RA, 2nd, Gourévitch B & Portfors CV. (2018). Subcortical pathways: Towards a better understanding  
692 of auditory disorders. *Hearing research* **362**, 48-60.
- 693
- 694 Fitzgibbons PJ & Gordon-Salant S. (1994). Age effects on measures of auditory duration discrimination.  
695 *Journal of speech and hearing research* **37**, 662-670.
- 696
- 697 Ghitza UE, Prokopenko VF, West MO & Fabbriatore AT. (2006). Higher magnitude accumbal phasic  
698 firing changes among core neurons exhibiting tonic firing increases during cocaine self-  
699 administration. *Neuroscience* **137**, 1075-1085.
- 700
- 701 Goldberg JM & Brown PB. (1969). Response of binaural neurons of dog superior olivary complex to  
702 dichotic tonal stimuli: some physiological mechanisms of sound localization. *Journal of*  
703 *neurophysiology* **32**, 613-636.
- 704
- 705 Grill-Spector K, Henson R & Martin A. (2006). Repetition and the brain: neural models of stimulus-  
706 specific effects. *Trends Cogn Sci* **10**, 14-23.
- 707

- 708 Gross CG, Schiller PH, Wells C & Gerstein GL. (1967). Single-unit activity in temporal association cortex of  
709 the monkey. *Journal of neurophysiology* **30**, 833-843.
- 710
- 711 Guo W, Clause AR, Barth-Maron A & Polley DB. (2017). A Corticothalamic Circuit for Dynamic Switching  
712 between Feature Detection and Discrimination. *Neuron* **95**, 180-194.e185.
- 713
- 714 Han X, Chow BY, Zhou H, Klapoetke NC, Chuong A, Rajimehr R, Yang A, Baratta MV, Winkle J, Desimone  
715 R & Boyden ES. (2011). A high-light sensitivity optical neural silencer: development and  
716 application to optogenetic control of non-human primate cortex. *Frontiers in systems*  
717 *neuroscience* **5**, 18.
- 718
- 719 Harris KC & Dubno JR. (2017). Age-related deficits in auditory temporal processing: unique contributions  
720 of neural dyssynchrony and slowed neuronal processing. *Neurobiology of aging* **53**, 150-158.
- 721
- 722 He J. (2003). Corticofugal modulation on both ON and OFF responses in the nonlemniscal auditory  
723 thalamus of the guinea pig. *J Neurophysiol* **89**, 367-381.
- 724
- 725 Heinemann LV, Kaiser J & Altmann CF. (2011). Auditory repetition enhancement at short interstimulus  
726 intervals for frequency-modulated tones. *Brain research* **1411**, 65-75.
- 727
- 728 Homma NY, Happel MFK, Nodal FR, Ohl FW, King AJ & Bajo VM. (2017). A Role for Auditory  
729 Corticothalamic Feedback in the Perception of Complex Sounds. *J Neurosci* **37**, 6149-6161.
- 730
- 731 Huang N & Elhilali M. (2017). Auditory salience using natural soundscapes. *The Journal of the Acoustical*  
732 *Society of America* **141**, 2163-2163.
- 733
- 734 Humes LE, Dubno JR, Gordon-Salant S, Lister JJ, Cacace AT, Cruickshanks KJ, Gates GA, Wilson RH &  
735 Wingfield A. (2012). Central presbycusis: a review and evaluation of the evidence. *Journal of the*  
736 *American Academy of Audiology* **23**, 635-666.
- 737
- 738 Jaekel BN, Newman RS & Goupell MJ. (2018). Age effects on perceptual restoration of degraded  
739 interrupted sentences. *The Journal of the Acoustical Society of America* **143**, 84-97.
- 740
- 741 James TW, Humphrey GK, Gati JS, Menon RS & Goodale MA. (2000). The effects of visual object priming  
742 on brain activation before and after recognition. *Current Biology* **10**, 1017-1024.
- 743
- 744 Jorgensen S & Dau T. (2011). Predicting speech intelligibility based on the signal-to-noise envelope  
745 power ratio after modulation-frequency selective processing. *The Journal of the Acoustical*  
746 *Society of America* **130**, 1475-1487.
- 747

- 748 Kalappa BI, Brozoski TJ, Turner JG & Caspary DM. (2014). Single unit hyperactivity and bursting in the  
749 auditory thalamus of awake rats directly correlates with behavioural evidence of tinnitus. *The*  
750 *Journal of physiology* **592**, 5065-5078.
- 751
- 752 Kato HK, Asinof SK & Isaacson JS. (2017). Network-Level Control of Frequency Tuning in Auditory Cortex.  
753 *Neuron* **95**, 412-423.e414.
- 754
- 755 Kayser C, Petkov CI, Lippert M & Logothetis NK. (2005). Mechanisms for allocating auditory attention: an  
756 auditory saliency map. *Current biology : CB* **15**, 1943-1947.
- 757
- 758 Koelsch S, Vuust P & Friston K. (2019). Predictive Processes and the Peculiar Case of Music. *Trends Cogn*  
759 *Sci* **23**, 63-77.
- 760
- 761 Kommajosyula SP, Cai R, Bartlett E & Caspary DM. (2019). Top-down or bottom up: decreased stimulus  
762 salience increases responses to predictable stimuli of auditory thalamic neurons. *J Physiol* **597**,  
763 2767-2784.
- 764
- 765 Krishna BS & Semple MN. (2000). Auditory temporal processing: responses to sinusoidally amplitude-  
766 modulated tones in the inferior colliculus. *J Neurophysiol* **84**, 255-273.
- 767
- 768 Luce PA & Pisoni DB. (1998). Recognizing spoken words: the neighborhood activation model. *Ear and*  
769 *hearing* **19**, 1-36.
- 770
- 771 Lumani A & Zhang H. (2010). Responses of neurons in the rat's dorsal cortex of the inferior colliculus to  
772 monaural tone bursts. *Brain Res* **1351**, 115-129.
- 773
- 774 Mafi AM, Hofer LN, Russ MG, Young JW & Mellott JG. (2020). The Density of Perineuronal Nets Increases  
775 With Age in the Inferior Colliculus in the Fischer Brown Norway Rat. *Frontiers in aging*  
776 *neuroscience* **12**, 27.
- 777
- 778 Malmierca MS, Anderson LA & Antunes FM. (2015). The cortical modulation of stimulus-specific  
779 adaptation in the auditory midbrain and thalamus: a potential neuronal correlate for predictive  
780 coding. *Frontiers in systems neuroscience* **9**, 19.
- 781
- 782 Malone BJ, Scott BH & Semple MN. (2010). Temporal Codes for Amplitude Contrast in Auditory Cortex.  
783 *The Journal of Neuroscience* **30**, 767-784.
- 784
- 785 Mamo SK, Grose JH & Buss E. (2016). Speech-evoked ABR: Effects of age and simulated neural temporal  
786 jitter. *Hearing research* **333**, 201-209.
- 787
- 788 Mardia KV & Jupp PE. (2000). *Directional Statistics*. New York: Wiley.

- 789  
790 McClaskey CM, Dias JW & Harris KC. (2019). Sustained envelope periodicity representations are  
791 associated with speech-in-noise performance in difficult listening conditions for younger and  
792 older adults. *Journal of neurophysiology* **122**, 1685-1696.
- 793  
794 McCormick DA & Pape HC. (1990). Noradrenergic and serotonergic modulation of a hyperpolarization-  
795 activated cation current in thalamic relay neurones. *The Journal of physiology* **431**, 319-342.
- 796  
797 Mihai PG, Moerel M, de Martino F, Trampel R, Kiebel S & von Kriegstein K. (2019). Modulation of  
798 tonotopic ventral medial geniculate body is behaviorally relevant for speech recognition. *Elife* **8**.
- 799  
800 Müller NG, Strumpf H, Scholz M, Baier B & Melloni L. (2013). Repetition suppression versus  
801 enhancement--it's quantity that matters. *Cerebral cortex* **23**, 315-322.
- 802  
803 Mumford D. (1992). On the computational architecture of the neocortex. II. The role of cortico-cortical  
804 loops. *Biological cybernetics* **66**, 241-251.
- 805  
806 Näätänen R, Paavilainen P, Rinne T & Alho K. (2007). The mismatch negativity (MMN) in basic research  
807 of central auditory processing: A review. *Clinical Neurophysiology* **118**, 2544-2590.
- 808  
809 Natan RG, Rao W & Geffen MN. (2017). Cortical Interneurons Differentially Shape Frequency Tuning  
810 following Adaptation. *Cell Rep* **21**, 878-890.
- 811  
812 Nelson PC & Carney LH. (2006). Cues for masked amplitude-modulation detection. *The Journal of the*  
813 *Acoustical Society of America* **120**, 978-990.
- 814  
815 Nelson PC & Carney LH. (2007). Neural rate and timing cues for detection and discrimination of  
816 amplitude-modulated tones in the awake rabbit inferior colliculus. *Journal of neurophysiology*  
817 **97**, 522-539.
- 818  
819 Obleser J. (2014). Putting the listening brain in context. *Language and Linguistics Compass* **8**, 646-658.
- 820  
821 Ono K, Kudoh M & Shibuki K. (2006). Roles of the auditory cortex in discrimination learning by rats. *The*  
822 *European journal of neuroscience* **23**, 1623-1632.
- 823  
824 Orman SS & Humphrey GL. (1981). Effects of changes in cortical arousal and of auditory cortex cooling  
825 on neuronal activity in the medial geniculate body. *Experimental brain research* **42**, 475-482.
- 826  
827 Parras GG, Nieto-Diego J, Carbajal GV, Valdes-Baizabal C, Escera C & Malmierca MS. (2017). Neurons  
828 along the auditory pathway exhibit a hierarchical organization of prediction error. *Nature*  
829 *communications* **8**, 2148.

- 830  
831 Parthasarathy A & Bartlett EL. (2011). Age-related auditory deficits in temporal processing in F-344 rats.  
832 *Neuroscience* **192**, 619-630.
- 833  
834 Paxinos W & Watson C. (1998). *The Rat Brain in Stereotaxic Coordinates*. Academic Press, San Diego.
- 835  
836 Peelle JE & Wingfield A. (2016). The Neural Consequences of Age-Related Hearing Loss. *Trends Neurosci*  
837 **39**, 486-497.
- 838  
839 Pérez-González D & Malmierca MS. (2014). Adaptation in the auditory system: an overview. *Front Integr*  
840 *Neurosci* **8**, 19-19.
- 841  
842 Pichora-Fuller MK, Alain C & Schneider BA. (2017). Older Adults at the Cocktail Party. In *The Auditory*  
843 *System at the Cocktail Party*, ed. Middlebrooks JC, Simon JZ, Popper AN & Fay RR, pp. 227-259.  
844 Springer International Publishing, Cham.
- 845  
846 Pichora-Fuller MK, Kramer SE, Eckert MA, Edwards B, Hornsby BW, Humes LE, Lemke U, Lunner T,  
847 Matthen M, Mackersie CL, Naylor G, Phillips NA, Richter M, Rudner M, Sommers MS, Tremblay  
848 KL & Wingfield A. (2016). Hearing Impairment and Cognitive Energy: The Framework for  
849 Understanding Effortful Listening (FUEL). *Ear and hearing* **37 Suppl 1**, 5s-27s.
- 850  
851 Pichora-Fuller MK, Schneider BA, Macdonald E, Pass HE & Brown S. (2007). Temporal jitter disrupts  
852 speech intelligibility: a simulation of auditory aging. *Hear Res* **223**, 114-121.
- 853  
854 Presacco A, Simon JZ & Anderson S. (2019). Speech-in-noise representation in the aging midbrain and  
855 cortex: Effects of hearing loss. *PLoS one* **14**, e0213899.
- 856  
857 Price CN, Alain C & Bidelman GM. (2019). Auditory-frontal Channeling in alpha and beta Bands is Altered  
858 by Age-related Hearing Loss and Relates to Speech Perception in Noise. *Neuroscience* **423**, 18-  
859 28.
- 860  
861 Rao RP & Ballard DH. (1999). Predictive coding in the visual cortex: a functional interpretation of some  
862 extra-classical receptive-field effects. *Nat Neurosci* **2**, 79-87.
- 863  
864 Recanzone G. (2018). The effects of aging on auditory cortical function. *Hear Res* **366**, 99-105.
- 865  
866 Richardson BD, Hancock KE & Caspary DM. (2013). Stimulus-specific adaptation in auditory thalamus of  
867 young and aged awake rats. *J Neurophysiol* **110**, 1892-1902.
- 868  
869 Roque L, Karawani H, Gordon-Salant S & Anderson S. (2019). Effects of Age, Cognition, and Neural  
870 Encoding on the Perception of Temporal Speech Cues. *Frontiers in neuroscience* **13**, 749.

871  
872 Rouiller EM & Welker E. (1991). Morphology of corticothalamic terminals arising from the auditory  
873 cortex of the rat: a Phaseolus vulgaris-leucoagglutinin (PHA-L) tracing study. *Hear Res* **56**, 179-  
874 190.

875  
876 Rybalko N, Suta D, Nwabueze-Ogbo F & Syka J. (2006). Effect of auditory cortex lesions on the  
877 discrimination of frequency-modulated tones in rats. *The European journal of neuroscience* **23**,  
878 1614-1622.

879  
880 Saalman YB & Kastner S. (2011). Cognitive and perceptual functions of the visual thalamus. *Neuron* **71**,  
881 209-223.

882  
883 Saderi D, Buran BN & David SV. (2020). Streaming of repeated noise in primary and secondary fields of  
884 auditory cortex. *J Neurosci*.

885  
886 Schofield BR & Hurley L. (2018). Circuits for Modulation of Auditory Function. In *The Mammalian*  
887 *Auditory Pathways*, pp. 235-267. Springer.

888  
889 Shannon RV, Zeng FG, Kamath V, Wygonski J & Ekelid M. (1995). Speech recognition with primarily  
890 temporal cues. *Science (New York, NY)* **270**, 303-304.

891  
892 Shinn-Cunningham BG & Wang D. (2008). Influences of auditory object formation on phonemic  
893 restoration. *The Journal of the Acoustical Society of America* **123**, 295-301.

894  
895 Smith PH, Bartlett EL & Kowalkowski A. (2007). Cortical and Collicular Inputs to Cells in the Rat  
896 Paralamina Thalamic Nuclei Adjacent to the Medial Geniculate Body. *Journal of*  
897 *Neurophysiology* **98**, 681-695.

898  
899 Sottile SY, Hackett TA, Cai R, Ling L, Llano DA & Caspary DM. (2017). Presynaptic Neuronal Nicotinic  
900 Receptors Differentially Shape Select Inputs to Auditory Thalamus and Are Negatively Impacted  
901 by Aging. *J Neurosci* **37**, 11377-11389.

902  
903 Strouse A, Ashmead DH, Ohde RN & Grantham DW. (1998). Temporal processing in the aging auditory  
904 system. *The Journal of the Acoustical Society of America* **104**, 2385-2399.

905  
906 Tabas A & von Kriegstein K. (2021). Adjudicating Between Local and Global Architectures of Predictive  
907 Processing in the Subcortical Auditory Pathway. *Front Neural Circuits* **15**, 644743.

908  
909 Tang J, Yang W & Suga N. (2012). Modulation of thalamic auditory neurons by the primary auditory  
910 cortex. *Journal of neurophysiology* **108**, 935-942.

911



- 912 Ulanovsky N, Las L & Nelken I. (2003). Processing of low-probability sounds by cortical neurons. *Nat*  
913 *Neurosci* **6**, 391-398.
- 914
- 915 Vaden KI, Jr., Kuchinsky SE, Ahlstrom JB, Teubner-Rhodes SE, Dubno JR & Eckert MA. (2016). Cingulo-  
916 Opercular Function During Word Recognition in Noise for Older Adults with Hearing Loss.  
917 *Experimental aging research* **42**, 67-82.
- 918
- 919 von Kriegstein K, Patterson RD & Griffiths TD. (2008). Task-dependent modulation of medial geniculate  
920 body is behaviorally relevant for speech recognition. *Current biology : CB* **18**, 1855-1859.
- 921
- 922 Wang H, Brozoski TJ, Turner JG, Ling L, Parrish JL, Hughes LF & Caspary DM. (2009). Plasticity at  
923 glycinergic synapses in dorsal cochlear nucleus of rats with behavioral evidence of tinnitus.  
924 *Neuroscience* **164**, 747-759.
- 925
- 926 Warren RM. (1970). Perceptual restoration of missing speech sounds. *Science (New York, NY)* **167**, 392-  
927 393.
- 928
- 929 Winer JA, Diehl JJ & Larue DT. (2001). Projections of auditory cortex to the medial geniculate body of the  
930 cat. *J Comp Neurol* **430**, 27-55.
- 931
- 932 Winer JA, Miller LM, Lee CC & Schreiner CE. (2005). Auditory thalamocortical transformation: structure  
933 and function. *Trends Neurosci* **28**, 255-263.
- 934
- 935 Wingfield A. (1975). Acoustic redundancy and the perception of time-compressed speech. *Journal of*  
936 *speech and hearing research* **18**, 96-104.
- 937
- 938 Yaron A, Jankowski MM, Badrieh R & Nelken I. (2020). Stimulus-specific adaptation to behaviorally-  
939 relevant sounds in awake rats. *PLoS one* **15**, e0221541.
- 940
- 941 Yin P, Johnson JS, O'Connor KN & Sutter ML. (2011). Coding of amplitude modulation in primary auditory  
942 cortex. *J Neurophysiol* **105**, 582-600.
- 943
- 944

945 **Table 1: Rate-level functions under control and CT blockade conditions for 60**  
946 **units**

| Intensity (dB) | Control (Mean±SEM) | CT blockade (Mean±SEM) | p-value* |
|----------------|--------------------|------------------------|----------|
| 0              | 15.927±1.5         | 15.493±1.5             | 0.564    |
| 10             | 15.75±1.7          | 14.306±1.5             | 0.152    |
| 20             | 15.195±1.5         | 13.941±1.5             | 0.07     |
| 30             | 14.797±1.5         | 13.997±1.5             | 0.346    |
| 40             | 16.0396±1.7        | 13.472±1.4             | 0.004    |
| 50             | 14.854±1.5         | 13.920±1.5             | 0.17     |
| 60             | 15.429±1.5         | 13.791±1.4             | 0.031    |
| 70             | 15.462±1.4         | 15.008±1.5             | 0.437    |
| 80             | 18.062±1.8         | 18.182±1.7             | 0.908    |

947 Comparisons are made between control (column 2) vs. CT blockade (column 3) in 60  
948 neurons; \*Column 4 represents the Bonferroni-corrected p-values for comparisons  
949 between MGB single-unit responses to control and CT blockade.

950

951

952

953

954

955

956

957

958

959 **Table 2: Bonferroni-corrected p-values for percentage of envelope-locking units**  
 960 **with changing sound stimuli modulation depth**

| fm range (Hz) | SAM <sub>Δ100</sub> vs. SAM <sub>Δ25%</sub> * |           | SAM <sub>Δ100</sub> vs. SAM <sub>Δ25%</sub> *<br>+CT blockade* |            |
|---------------|-----------------------------------------------|-----------|----------------------------------------------------------------|------------|
|               | Random                                        | Repeating | Random                                                         | Repeating  |
| 2             | 0.037                                         | 0.0079    | 0.037                                                          | 0.0014     |
| 4             | 0.00082                                       | 0.000012  | 0.0071                                                         | 0.000098   |
| 8             | 0.00016                                       | 0.00048   | 0.00000072                                                     | 0.00016    |
| 16            | 0.0000072                                     | 0.000034  | 0.0000042                                                      | 0.000058   |
| 32            | 0.000034                                      | 0.000012  | 0.000034                                                       | 0.000034   |
| 64            | 0.0000001                                     | 0.0000001 | 0.0000001                                                      | 0.00000019 |
| 128           | 0.000058                                      | 0.00048   | 0.000058                                                       | 0.00082    |

961 \*Each row represents the Bonferroni-corrected p-values following the Wilcoxon tests for  
 962 corresponding *fm* (in Hz) in the first column of the row. Comparisons are made between  
 963 salient vs. less-salient (column 2) and salient vs. less-salient+ CT blockade (column 3)  
 964 in all the of neurons (n=80).

965

966

967

968

969

970

971

972

973

974 **Table 3: Bonferroni-corrected p-values for PPI values of 56 units sensitive to**  
 975 **modulation depth change**

| <i>f</i> m range (Hz) | SAM <sub>Δ100</sub> vs. SAM <sub>Δ25%</sub> * | SAM <sub>Δ25</sub> vs. SAM <sub>Δ25%</sub> *<br>+CT blockade* | SAM <sub>Δ100</sub> vs. SAM <sub>Δ25%</sub> *<br>+CT blockade* |
|-----------------------|-----------------------------------------------|---------------------------------------------------------------|----------------------------------------------------------------|
| 2~1024                | 0.000001                                      | 1.4624E-11                                                    | 0.019                                                          |
| 2~8                   | 0.194306274                                   | 0.002414952                                                   | 0.238624372                                                    |
| 4~16                  | 0.026271845                                   | 7.2624E-06                                                    | 0.081380638                                                    |
| 8~32                  | 0.004712185                                   | 3.10386E-07                                                   | 0.071969343                                                    |
| 16~64                 | 0.004245266                                   | 3.88949E-06                                                   | 0.213901181                                                    |
| 32~128                | 0.000870169                                   | 8.76613E-06                                                   | 0.533565168                                                    |
| 64~256                | 5.21613E-05                                   | 4.47651E-08                                                   | 0.347311451                                                    |
| 128~512               | 6.14401E-05                                   | 7.89532E-10                                                   | 0.091124673                                                    |
| 256~1024              | 3.8719E-05                                    | 4.2874E-11                                                    | 0.039640353                                                    |

976 \*Each row represents the Bonferroni-corrected p-values to corresponding *f*m range (in  
 977 Hz) in the first column of the row. Comparisons are made between salient vs. less-  
 978 salient (column 2); less-salient vs. less-salient + CT blockade (column 3); and salient vs.  
 979 less-salient+ CT blockade (column 4) in the majority of neurons (n=56).

980

981

982

983

984

985

986

987

988

989 **Table 4: Bonferroni-corrected p-values for PPI values of 15 units insensitive to**  
 990 **modulation depth change**

| <i>fm</i> range (Hz) | SAM <sub>Δ100</sub> vs. SAM <sub>Δ25%</sub> * | SAM <sub>Δ25</sub> vs. SAM <sub>Δ25%</sub> *<br>+CT blockade* | SAM <sub>Δ100</sub> vs. SAM <sub>Δ25%</sub> *<br>+CT blockade* |
|----------------------|-----------------------------------------------|---------------------------------------------------------------|----------------------------------------------------------------|
| 2~1024               | 0.823374867                                   | 1.48214E-05                                                   | 0.000142022                                                    |
| 2~8                  | 0.774652034                                   | 0.992047279                                                   | 0.840986588                                                    |
| 4~16                 | 0.811395141                                   | 0.79258215                                                    | 0.41545121                                                     |
| 8~32                 | 0.973549441                                   | 0.238930012                                                   | 0.342751939                                                    |
| 16~64                | 0.946456635                                   | 0.018936675                                                   | 0.044413028                                                    |
| 32~128               | 0.800376342                                   | 0.002708837                                                   | 0.000256347                                                    |
| 64~256               | 0.239459428                                   | 0.003792644                                                   | 5.52114E-06                                                    |
| 128~512              | 0.705864677                                   | 0.001001792                                                   | 4.09608E-05                                                    |
| 256~1024             | 0.997297984                                   | 0.000232669                                                   | 0.000175392                                                    |

991 \*Each row represents the Bonferroni-corrected p-values to corresponding *fm* range (in  
 992 Hz) in the first column of the row. Comparisons are made between salient vs. less-  
 993 salient (column 2); less-salient vs. less-salient + CT blockade (column 3); and salient vs.  
 994 less-salient+ CT blockade (column 4) in the minority of neurons (n=15).

995

996

997

998

999

1000

1001

1002

1003

1004 **Table 5: An average of total spike count and Bonferroni-corrected p-values**  
 1005 **across all neurons to standard and weakly modulated stimuli presented in**  
 1006 **random or repeating order.**

| <i>Presentation order</i> | Total spike count    |                     |                                   | p-value*                                     |                                                           |                                                            |
|---------------------------|----------------------|---------------------|-----------------------------------|----------------------------------------------|-----------------------------------------------------------|------------------------------------------------------------|
|                           | SAM <sub>Δ100%</sub> | SAM <sub>Δ25%</sub> | SAM <sub>Δ25%</sub> + CT blockade | SAM <sub>Δ100%</sub> vs. SAM <sub>Δ25%</sub> | SAM <sub>Δ25%</sub> vs. SAM <sub>Δ25%</sub> + CT blockade | SAM <sub>Δ100%</sub> vs. SAM <sub>Δ25%</sub> + CT blockade |
| Random                    | 839.2±54.6           | 675.6±45.1          | 708.6±50.3                        | 0.000005                                     | 0.549                                                     | 0.001                                                      |
| Repeating                 | 731.3±46.3           | 693.5±45.1          | 625.8±50.2                        | 0.618                                        | 0.011                                                     | 0.0024                                                     |

1007 Each row represents the average total spike count to SAM<sub>Δ100%</sub> vs. SAM<sub>Δ25%</sub> and the

1008 \*Bonferroni-corrected p-values following the repeated measures ANOVA for

1009 comparisons. Comparisons were made between SAM<sub>Δ100%</sub> vs. SAM<sub>Δ25%</sub>, and SAM<sub>Δ25%</sub>

1010 vs. SAM<sub>Δ100%</sub> vs. SAM<sub>Δ100%</sub> vs. SAM<sub>Δ25%</sub> + CT blockade, and SAM<sub>Δ100%</sub> vs. SAM<sub>Δ25%</sub> +

1011 CT blockade in all the of neurons (n=80).
